# Supplementary material for: Distribution of risk factors differs from coronary heart disease and stroke in China: a national population survey
Source: PubMed Central journal article supplement — BMJ Open. 2022 Nov 23;12(11):e065970. doi: 10.1136/bmjopen-2022-065970 (PMC9693642; doi:10.1136/bmjopen-2022-065970), 2022-11-23
Supplement: bmjopen-2022-065970.draft_revisions.pdf [file bmjopen-2022-065970.draft_revisions.pdf]

# BMJ Open

BMJ Open is committed to open peer review. As part of this commitment we make the peer review history of every article we publish publicly available.

When an article is published we post the peer reviewers' comments and the authors' responses online. We also post the versions of the paper that were used during peer review. These are the versions that the peer review comments apply to.

The versions of the paper that follow are the versions that were submitted during the peer review process. They are not the versions of record or the final published versions. They should not be cited or distributed as the published version of this manuscript.

BMJ Open is an open access journal and the full, final, typeset and author-corrected version of record of the manuscript is available on our site with no access controls, subscription charges or pay-per-view fees (<http://bmjopen.bmj.com>).

If you have any questions on BMJ Open's open peer review process please email [info.bmjopen@bmj.com](mailto:info.bmjopen@bmj.com)

# BMJ Open

## Distribution Differences of Risk Factors for Coronary Heart Disease and Stroke in China: Findings from the China National Stroke Screening Survey

|                               |                                                                                                                                                                                                                                                                                                                                                                                                                                                                                                                                                                                                                                                                                                                                                                                                                                                                                                                                                                                                                                        |
|-------------------------------|----------------------------------------------------------------------------------------------------------------------------------------------------------------------------------------------------------------------------------------------------------------------------------------------------------------------------------------------------------------------------------------------------------------------------------------------------------------------------------------------------------------------------------------------------------------------------------------------------------------------------------------------------------------------------------------------------------------------------------------------------------------------------------------------------------------------------------------------------------------------------------------------------------------------------------------------------------------------------------------------------------------------------------------|
| Journal:                      | <i>BMJ Open</i>                                                                                                                                                                                                                                                                                                                                                                                                                                                                                                                                                                                                                                                                                                                                                                                                                                                                                                                                                                                                                        |
| Manuscript ID                 | bmjopen-2022-065970                                                                                                                                                                                                                                                                                                                                                                                                                                                                                                                                                                                                                                                                                                                                                                                                                                                                                                                                                                                                                    |
| Article Type:                 | Original research                                                                                                                                                                                                                                                                                                                                                                                                                                                                                                                                                                                                                                                                                                                                                                                                                                                                                                                                                                                                                      |
| Date Submitted by the Author: | 23-Jun-2022                                                                                                                                                                                                                                                                                                                                                                                                                                                                                                                                                                                                                                                                                                                                                                                                                                                                                                                                                                                                                            |
| Complete List of Authors:     | Li, Yapeng; The First Affiliated Hospital of Zhengzhou University, Department of Neurology<br>Yin, Ling; Chinese PLA General Hospital<br>Shen, Ying; Xuanwu Hospital<br>Wang, Anran; The First Affiliated Hospital of Zhengzhou University, Department of Neurology<br>Zhou, Lue; The First Affiliated Hospital of Zhengzhou University, Department of Neurology<br>Gao, Yuan; The First Affiliated Hospital of Zhengzhou University, Department of Neurology<br>Li, Yusheng; The First Affiliated Hospital of Zhengzhou University, Department of Neurology<br>Lu, Jie; Zhengzhou University, Department of Epidemiology and Health Statistics<br>shi, songhe; Zhengzhou University, Department of Epidemiology and Biostatistics<br>Tian, Chuansheng; Chinese Preventive Medicine Association<br>Xu, Yuming; The First Affiliated Hospital of Zhengzhou University, Department of Neurology<br>Wang, Longde; The First Affiliated Hospital of Zhengzhou University, Department of Neurology; Chinese Preventive Medicine Association |
| Keywords:                     | Coronary heart disease < CARDIOLOGY, Stroke < NEUROLOGY, Cardiac Epidemiology < CARDIOLOGY, EPIDEMIOLOGY, PUBLIC HEALTH                                                                                                                                                                                                                                                                                                                                                                                                                                                                                                                                                                                                                                                                                                                                                                                                                                                                                                                |
|                               |                                                                                                                                                                                                                                                                                                                                                                                                                                                                                                                                                                                                                                                                                                                                                                                                                                                                                                                                                                                                                                        |

SCHOLARONE™  
Manuscripts

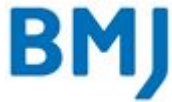

I, the Submitting Author has the right to grant and does grant on behalf of all authors of the Work (as defined in the below author licence), an exclusive licence and/or a non-exclusive licence for contributions from authors who are: i) UK Crown employees; ii) where BMJ has agreed a CC-BY licence shall apply, and/or iii) in accordance with the terms applicable for US Federal Government officers or employees acting as part of their official duties; on a worldwide, perpetual, irrevocable, royalty-free basis to BMJ Publishing Group Ltd ("BMJ") its licensees and where the relevant Journal is co-owned by BMJ to the co-owners of the Journal, to publish the Work in this journal and any other BMJ products and to exploit all rights, as set out in our [licence](#).

The Submitting Author accepts and understands that any supply made under these terms is made by BMJ to the Submitting Author unless you are acting as an employee on behalf of your employer or a postgraduate student of an affiliated institution which is paying any applicable article publishing charge ("APC") for Open Access articles. Where the Submitting Author wishes to make the Work available on an Open Access basis (and intends to pay the relevant APC), the terms of reuse of such Open Access shall be governed by a Creative Commons licence – details of these licences and which [Creative Commons](#) licence will apply to this Work are set out in our licence referred to above.

Other than as permitted in any relevant BMJ Author's Self Archiving Policies, I confirm this Work has not been accepted for publication elsewhere, is not being considered for publication elsewhere and does not duplicate material already published. I confirm all authors consent to publication of this Work and authorise the granting of this licence.

# Distribution Differences of Risk Factors for Coronary Heart Disease and Stroke in China: Findings from the China National Stroke Screening Survey

Yapeng Li<sup>1,2</sup>, Ling Yin<sup>3</sup>, Ying Shen<sup>4</sup>, Anran Wang<sup>1,2</sup>, Lue Zhou<sup>1,2</sup>, Yuan Gao<sup>1,2</sup>, Yusheng Li<sup>1,2</sup>, Jie Lu<sup>5</sup>, Songhe Shi<sup>5</sup>, Chuansheng Tian<sup>6</sup>, Yuming Xu<sup>1,2\*</sup>, Longde Wang<sup>1,6,7\*</sup>; on behalf of the China National Stroke Screening Survey investigators

<sup>1</sup> Department of Neurology, the First Affiliated Hospital of Zhengzhou University, Zhengzhou, China

<sup>2</sup> National Health Commission Key Laboratory of Prevention and treatment of Cerebrovascular Diseases

<sup>3</sup> Department of Neurology, the Chinese PLA General Hospital, Beijing, China

<sup>4</sup> Department of Traditional Chinese Medicine, Xuanwu Hospital of Capital Medical University, Beijing, China

<sup>5</sup> Department of Epidemiology and Health Statistics, College of Public Health, Zhengzhou University, Zhengzhou, China

<sup>6</sup> Chinese Preventive Medicine Association, Beijing, China

<sup>7</sup> Stroke Prevention Project Office, National Health Commission of the People's Republic of China, Beijing, China

## \* Correspondence:

Longde Wang, MD, PhD, Department of Neurology, the First Affiliated Hospital of Zhengzhou University; Chinese Preventive Medicine Association, No.25 Huaweili Road, Chaoyang District, Beijing, China, 100021. Tel./Fax: +86 10 84039879; Email: longde\_wang@yeah.net

Or Yuming Xu, MD, PhD, Department of Neurology, the First Affiliated Hospital of Zhengzhou University, No.1 Eastern Jianshe Road, Erqi District, Zhengzhou, Henan Province, China, 450052. Tel./Fax: +86 371 66862132; E-mail: xuyuming@zzu.edu.cn

**Keywords:** Coronary heart disease, Stroke, Cardiovascular diseases, Risk factors, Heterogeneity

## Abstract

**Objectives:** This study aimed to explore the distribution differences of common risk factors between coronary heart disease (CHD) and stroke in China.

**Setting:** The China National Stroke Screening Survey is a cluster sampling survey based on a nationwide general community population, adopting multi-stage stratified sampling method and covering all 31 provinces in China mainland.

**Participants:** Total number of 725 707 people aged 40 and above were included in the study.

**Primary and secondary outcome measures:** The basic demographic information, lifestyle behavior, physical examination, traditional risk factors, family history of cardiovascular disease

(CVD) and CVD events were collected. Risk factors of CHD and stroke were explored and analyzed in the whole investigated population to identify the common risk factors. Multivariate logistic regression analysis was used to analyze the distribution difference of risk factors between CHD and stroke.

**Results:** There were 13 variables associated with CHD and stroke, in which 11 variables revealed differences in the distribution between CHD and stroke. Family history of stroke (OR: 2.30; 95% CI, 2.15-2.45), male (OR: 1.92; 95% CI, 1.80-2.05), rural areas (OR: 1.70; 95% CI, 1.60-1.80), transient ischemic attack (OR: 1.41; 95% CI, 1.30-1.54) and hypertension (OR: 1.28; 95% CI, 1.19-1.38) indicated significantly stronger association with stroke, while family history of CHD (OR: 0.25; 95% CI, 0.23-0.27), atrial fibrillation (OR: 0.60; 95% CI, 0.51-0.71), diabetes (OR: 0.76; 95% CI, 0.71-0.81), dyslipidemia (OR: 0.76; 95% CI, 0.72-0.81), smoking (OR: 0.79; 95% CI, 0.73-0.85) and overweight/obesity (OR: 0.90; 95% CI, 0.86-0.93) had closer relationship with CHD.

**Conclusions:** The distribution of risk factors for CHD and stroke were substantial differences. More specific prevention and control measures should be formulated according to the distribution differences of risk factors related to CVD.

### Strengths and limitations of this study

The China National Stroke Screening Survey is a nationwide cross-sectional study based on general community population.

CHD and stroke had many common risk factors, while the distribution of specific risk factors between CHD and stroke were substantial differences.

More specific prevention and control measures should be formulated according to the distribution differences of risk factors related to CVD.

## 1 Introduction

Cardiovascular disease (CVD) is the leading cause of death in China and worldwide<sup>1,2</sup>. Previous studies have shown the significant regional and ethnic differences in the incidence and mortality of CVD<sup>3-6</sup>. For example, coronary heart disease (CHD) is the leading cause of death in most Western countries, while stroke is more common in China<sup>4-6</sup>. The distributional differences of specific risk factors for different CVD types may be an important reason for this phenomenon. To clarify the relationship between different risk factors and the first manifestation of CVD can help us better understand the pathophysiological mechanism of different CVD, as well as the potential benefits of controlling these risk factors.

Many previous studies have considered the CHD and stroke as a whole to explore common risk factors of both<sup>7-9</sup>. Only a few studies investigated the differences of risk factors between CHD and stroke in a same cohort<sup>10-14</sup>, some of which just enrolled male or female populations<sup>10,11</sup>, or only reported the difference of a single risk factor<sup>12</sup>, or conducted based on a small sample size<sup>14</sup>. There is still lack of large sample size, representative population-based research about whether differences exist in the distribution of risk factors between CHD and stroke. The China National Stroke Screening Survey (CNSSS) is a nationwide cross-sectional study based on general community population. By analyzing the data collected from the CNSSS, this study aimed to explore the specific common risk factors of CHD and stroke and whether there are differences in the distribution of these specific risk factors between CHD and stroke.

## 74 2 Materials and Methods

### 75 2.1 Study design

76 The CNSSS is a cluster sampling survey based on a nationwide general community population,  
77 adopting multi-stage stratified sampling method and covering all 31 provinces in China mainland.  
78 The initial stages of CNSSS had been described in our previous publications<sup>15-19</sup>.

79 In the first stage, a certain number of prefecture-level cities were selected by each province  
80 according to the different proportion of the Sixth National Population Census of China in 2010. In  
81 the second stage, one urban street and one rural town were selected from each prefecture-level city,  
82 respectively. In the third stage, residents aged 40 and above were selected as a group in a given  
83 number of urban streets and rural towns, and the response rate of each place was required to be no  
84 less than 85%. Ultimately, 828 764 subjects from 256 streets and towns participated in the survey,  
85 each of whom signed a written informed consent.

### 86 2.2 Data collection

87 A questionnaire survey which conducted by trained staff was performed based on the population  
88 aged 40 and above in the sampled communities and towns by adopting the unified epidemiological  
89 survey scale of CVD. The project developed a data reporting information platform, in which the  
90 information of the paper questionnaire was reported uniformly by trained staff of each sub-center.  
91 The following variables were analyzed for the present study: (1) basic demographic information: sex,  
92 age and place of residence; (2) lifestyle behavior: smoking, alcohol consumption, and exercise; (3)  
93 physical examination: blood pressure, height, weight, body mass index (BMI); (4) traditional risk  
94 factors: hypertension, diabetes, dyslipidemia, atrial fibrillation (AF), transient ischemic attack (TIA),  
95 family history of CHD or stroke; (5) CVD events: CHD, stroke.

### 96 2.3 Definition of cardiovascular diseases and risk factors

97 The diagnosis of CHD and stroke were confirmed by professional doctors, based on self-reported  
98 history and medical records. Blood pressure, fasting blood sugar, fasting blood lipids and BMI were  
99 measured on site for all survey subjects<sup>19,20</sup>. Hypertension was diagnosed by self-reported history of  
100 hypertension, or current use of anti-hypertensive drugs within 2 weeks, or elevated blood pressure  
101 (systolic pressure  $\geq 140$ mmhg or diastolic pressure  $\geq 90$ mmhg) in the on-site measurement<sup>16</sup>.  
102 Diabetes was diagnosed by self-report history of diabetes, or current use of hypoglycemic drugs, or  
103 fasting blood glucose  $\geq 7.0$ mmol/l in the on-site measurement<sup>17</sup>. Dyslipidemia was diagnosed by self-  
104 reported history of dyslipidemia, or current use of lipid-lowering drugs, or the detection of one or  
105 more of the following status (total cholesterol  $\geq 240$  mg/dl, triglycerides  $\geq 200$  mg/dl, HDL  $< 40$   
106 mg/dl) in the on-site measurement<sup>17</sup>. AF was diagnosed by self-reported history of AF, or previous  
107 electrocardiogram support, or the detection of AF indicated in electrocardiogram in the on-site  
108 measurement<sup>18</sup>. Body mass index was calculated as weight in kilograms divided by height in meters  
109 squared. Overweight was defined as  $24 \leq \text{BMI} < 28$ , and obesity was defined as  $\text{BMI} \geq 28$ <sup>16</sup>. Smoking  
110 was defined as one cigarette per day for at least three consecutive months. Regular drinking was  
111 defined as drinking at least 3 times per week with the consumption of alcohol more than 100 g. Lack  
112 of exercise was defined as weekly exercise less than 3 times the intensity of moderate and above  
113 exercise  $\geq 30$  minutes. Exercise lack is defined as moderate or higher intensity exercise no less than 3  
114 times per week, no less than 30 minutes each time.

### 115 2.4 Quality control

The National Health and Family Planning Commission had established a special project office responsible for the quality control, organization and coordination of the project. Firstly, this study conducted a unified training for all personnel involved in questionnaire survey, physical examination and data entry. The training course was divided into two steps below: the provincial training was responsible by the project office, and the training of participating units in the province was managed by provincial units. Secondly, the data reporting information platform could realize automatic control of the system, systematic checking of necessary items, and questionnaires with unfinished or incomplete items could not be submitted successfully. Thirdly, epidemiologists and statistical experts were organized by the project office to analyze the data reported by the sub-centers, who were responsible for checking abnormal data and returning to the sub-centers for one-by-one review.

## 2.5 Patient and public involvement

Patients were not involved in the design, or conduct, or reporting, or dissemination plans of our research.

## 2.6 Statistical analysis

The statistical analysis was carried out in two steps. Firstly, Risk factors of CHD and stroke were explored and analyzed in the whole investigated population to identify the common risk factors. Secondly, people with both CHD and stroke were excluded, as well as those neither with CHD nor with stroke, we just took the samples only with CHD and the samples only with stroke as our analysis population, then taking CVD as dependent variables (stroke was defined as 1, whereas CHD was defined as 0) and the common risk factors as independent variables, multivariate logistic regression analysis was carried out to study the distribution difference of the common risk factors between CHD and stroke.

Descriptive analysis was performed for baseline information. Categorical variables were expressed as n (%), and continuous variables were presented in the form of mean  $\pm$  standard deviation.  $\chi^2$  test and t test were used for univariate analysis of categorical variables and continuous variables, and the differences were statistically significant with  $P < 0.1$ . Binary Logistic regression was utilized for multivariate analysis, the odd ratio (OR) and 95% confidence interval (CI) were calculated by backward stepwise regression, and the difference was statistically significant with  $P < 0.05$ . SPSS19.0 was used for all statistical analyses (SPSS Inc., Chicago, Illinois, USA).

## 3 Results

### 3.1 Basic information

A total of 828 764 permanent residents in general communities aged 40 and above completed the survey from May 2014 to April 2015. Of these, we excluded data from project areas with a response rate less than 85%, incomplete baseline information and abnormal data. Finally, 725 707 people were included in the study. The average age was  $57.23 \pm 11.40$  years, with males accounting for 46.73% and the rural population accounting for 52.55% of the total. All variables had sex difference except BMI. To be specific, the rates of smoking and drinking of males were significantly higher than those of females, whereas there was an opposite relationship in other variables. Furthermore, except hypertension, all variables revealed geographical difference. The proportion of smoking and drinking in rural areas was higher than that in urban areas, and the proportion of other variables in urban areas were higher than that in rural areas (Table 1).

157

Table 1. General Characteristics of the CNSSS

| Characteristics          | Total, n (%)  | Sex, n (%)    |               | Region, n (%) |               | P value for sex | P value for region |
|--------------------------|---------------|---------------|---------------|---------------|---------------|-----------------|--------------------|
|                          |               | female        | male          | urban         | rural         |                 |                    |
| Age, y                   | 57.23±11.40   | 57.40±11.38   | 57.03±11.41   | 57.26±11.50   | 57.20±11.30   | < 0.001         | 0.029              |
| 40~                      | 224173(30.89) | 115964(30.00) | 108209(31.91) | 106788(31.01) | 117385(30.78) | < 0.001         | < 0.001            |
| 50~                      | 213000(29.35) | 115023(29.76) | 97977(28.89)  | 101240(29.40) | 111760(29.31) |                 |                    |
| 60~                      | 172780(23.81) | 93393(24.16)  | 79387(23.41)  | 79411(23.06)  | 93369(24.48)  |                 |                    |
| 70~                      | 86475(11.92)  | 46161(11.94)  | 40314(11.89)  | 42716(12.41)  | 43759(11.47)  |                 |                    |
| 80~                      | 29279(4.03)   | 16018(4.14)   | 13261(3.91)   | 14188(4.12)   | 15091(3.96)   |                 |                    |
| Height, cm               | 162.96±8.12   | 158.26±6.31   | 168.31±6.48   | 163.95±7.91   | 162.06±8.20   | < 0.001         | < 0.001            |
| Weight, kg               | 63.63±10.04   | 59.94±8.87    | 67.83±9.63    | 64.69±9.99    | 62.66±9.98    | < 0.001         | < 0.001            |
| BMI, kg/m <sup>2</sup>   | 23.91±3.04    | 23.92±3.20    | 23.90±2.85    | 24.02±3.00    | 23.81±3.07    | 0.130           | < 0.001            |
| < 18.5                   | 16308(2.25)   | 10052(2.60)   | 6256(1.84)    | 6913(2.01)    | 9395(2.46)    | < 0.001         | < 0.001            |
| 18.5~24                  | 380043(52.37) | 201371(52.09) | 178672(52.68) | 174900(50.79) | 205143(53.79) |                 |                    |
| 24~28                    | 264385(36.43) | 136843(35.40) | 127542(37.61) | 131176(38.09) | 133209(34.93) |                 |                    |
| ≥28                      | 64971(8.95)   | 38293(9.91)   | 26678(7.87)   | 31354(9.11)   | 33617(8.81)   |                 |                    |
| Smoking                  | 47997(6.61)   | 4163(1.08)    | 43834(12.92)  | 20223(5.87)   | 27774(7.28)   | < 0.001         | < 0.001            |
| Regular drinking         | 24939(3.44)   | 2148(0.56)    | 22791(6.72)   | 11574(3.36)   | 13365(3.50)   | < 0.001         | 0.001              |
| Lack of exercise         | 59712(8.23)   | 33104(8.56)   | 26608(7.85)   | 31722(9.21)   | 27990(7.34)   | < 0.001         | < 0.001            |
| Hypertension             | 121281(16.71) | 65681(16.99)  | 55600(16.39)  | 57538(16.71)  | 63743(16.71)  | < 0.001         | 0.955              |
| Diabetes                 | 39752(5.48)   | 22283(5.76)   | 17469(5.15)   | 21770(6.32)   | 17982(4.72)   | < 0.001         | < 0.001            |
| Dyslipidemia             | 113159(15.59) | 62817(16.25)  | 50342(14.84)  | 56793(16.55)  | 56186(14.73)  | < 0.001         | < 0.001            |
| AF                       | 2783(0.38)    | 1636(0.42)    | 1147(0.34)    | 1433(0.42)    | 1350(0.35)    | < 0.001         | < 0.001            |
| TIA                      | 13284(1.83)   | 8199(2.12)    | 5085(1.50)    | 6707(1.95)    | 6577(1.72)    | < 0.001         | < 0.001            |
| Family history of CHD    | 13077(1.80)   | 7947(2.06)    | 5130(1.51)    | 8070(2.34)    | 5007(1.31)    | < 0.001         | < 0.001            |
| Family history of stroke | 30103(4.15)   | 16987(4.39)   | 13116(3.87)   | 15553(4.52)   | 14550(3.82)   | < 0.001         | < 0.001            |

CNSSS, China National Stroke Screening Survey; BMI, body mass index; AF, atrial fibrillation; TIA, transient ischemic attack; CHD, coronary heart disease



### 3.2 Common risk factors of CHD and stroke

In the univariate factor analysis, all 14 variables were associated with CHD and stroke (Table 2). After adjusting for other risk factors, 13 variables (except alcohol consumption) were associated with CHD and stroke. There was a negative correlation of males and rural population with CHD, while hypertension, family history of CHD, dyslipidemia, AF, TIA, smoking, diabetes, family history of stroke, age, lack of exercise, overweight/obesity and alcohol consumption were positively correlated with CHD. Besides, all the 13 risk factors were positively correlated with stroke (Table 3). According to the odds ratio (OR) value from high to low, Figure 1 showed the distribution of risk factors of CHD and stroke.

For peer review only

Table 2. Univariate analysis of risk factors for CHD and stroke

| Characteristics          | CHD, n (%)  |               |           |         | Stroke, n (%) |               |           |         |
|--------------------------|-------------|---------------|-----------|---------|---------------|---------------|-----------|---------|
|                          | Yes         | No            | $\chi^2$  | P value | Yes           | No            | $\chi^2$  | P value |
| Total                    | 10654       | 715053        |           |         | 15989         | 709718        |           |         |
| Sex (male)               | 4125(28.72) | 335023(46.85) | 279.078   | < 0.001 | 8110(50.72)   | 331038(46.64) | 104.502   | < 0.001 |
| Region (rural)           | 4379(41.10) | 376985(52.72) | 568.386   | < 0.001 | 8515(53.26)   | 372849(52.53) | 3.256     | 0.071   |
| Age                      |             |               | 4657.234  | < 0.001 |               |               | 6926.216  | < 0.001 |
| 40~                      | 687(6.45)   | 223486(31.25) |           |         | 913(5.71)     | 223260(31.46) |           |         |
| 50~                      | 2324(21.81) | 210676(29.46) |           |         | 3539(22.13)   | 209461(29.51) |           |         |
| 60~                      | 4209(39.51) | 168571(23.57) |           |         | 6644(41.55)   | 166136(23.41) |           |         |
| 70~                      | 2767(25.97) | 83708(11.71)  |           |         | 3915(24.49)   | 82560(11.63)  |           |         |
| 80~                      | 667(6.26)   | 28612(4.00)   |           |         | 978(6.12)     | 28301(3.99)   |           |         |
| BMI                      |             |               | 2767.767  | < 0.001 |               |               | 2261.651  | < 0.001 |
| < 18.5                   | 207(1.94)   | 16101(2.25)   |           |         | 322(2.01)     | 15986(2.25)   |           |         |
| 18.5~24                  | 3420(32.10) | 376623(52.67) |           |         | 5875(36.74)   | 374168(52.72) |           |         |
| 24~28                    | 4588(43.06) | 259797(36.33) |           |         | 6841(42.79)   | 257544(36.29) |           |         |
| ≥28                      | 2439(22.89) | 62532(8.75)   |           |         | 2951(18.46)   | 62020(8.74)   |           |         |
| Smoking                  | 2628(24.67) | 45369(6.34)   | 5705.550  | < 0.001 | 4416(27.62)   | 43581(6.14)   | 11679.211 | < 0.001 |
| Regular drinking         | 1551(14.56) | 23388(3.27)   | 4030.177  | < 0.001 | 2484(17.81)   | 22455(3.16)   | 7212.358  | < 0.001 |
| Lack of exercise         | 4269(40.07) | 55443(7.75)   | 14518.060 | < 0.001 | 6013(37.61)   | 53699(7.57)   | 18687.903 | < 0.001 |
| Hypertension             | 8614(80.85) | 112667(15.76) | 31958.204 | < 0.001 | 13182(82.44)  | 108099(15.23) | 50750.234 | < 0.001 |
| Diabetes                 | 3565(33.46) | 36187(5.06)   | 16353.881 | < 0.001 | 4118(25.75)   | 35634(5.02)   | 12983.573 | < 0.001 |
| Dyslipidemia             | 6883(64.60) | 106276(14.86) | 19734.787 | < 0.001 | 8982(56.18)   | 104177(14.68) | 20458.912 | < 0.001 |
| AF                       | 397(3.73)   | 2386(0.33)    | 3162.834  | < 0.001 | 387(2.42)     | 2396(0.34)    | 1775.677  | < 0.001 |
| TIA                      | 1409(13.23) | 11875(1.66)   | 7812.480  | < 0.001 | 2504(15.66)   | 10780(1.52)   | 17402.607 | < 0.001 |
| Family history of CHD    | 2762(25.92) | 10315(1.44)   | 35557.668 | < 0.001 | 1808(11.31)   | 11269(1.59)   | 8348.822  | < 0.001 |
| Family history of stroke | 3061(28.73) | 27042(3.78)   | 16434.360 | < 0.001 | 6069(37.96)   | 24034(3.39)   | 47002.257 | < 0.001 |

169 CHD, coronary heart disease; BMI, body mass index; AF, atrial fibrillation; TIA, transient ischemic attack

170 Table 3. Multivariate logistic regression analysis of risk factors for CHD and stroke

| Characteristics          | CHD             |         | Stroke          |         |
|--------------------------|-----------------|---------|-----------------|---------|
|                          | OR (95%CI)      | P value | OR (95%CI)      | P value |
| Sex (male)               | 0.63(0.59-0.66) | < 0.001 | 1.18(1.14-1.23) | < 0.001 |
| Region (rural)           | 0.73(0.70-0.76) | < 0.001 | 1.17(1.13-1.21) | < 0.001 |
| Age                      | 1.54(1.51-1.57) | < 0.001 | 1.52(1.50-1.55) | < 0.001 |
| BMI                      | 1.16(1.13-1.20) | < 0.001 | 1.03(1.00-1.05) | 0.034   |
| Smoking                  | 1.79(1.68-1.90) | < 0.001 | 1.45(1.39-1.52) | < 0.001 |
| Lack of exercise         | 1.37(1.31-1.43) | < 0.001 | 1.35(1.30-1.40) | < 0.001 |
| Hypertension             | 5.83(5.49-6.18) | < 0.001 | 9.09(8.65-9.55) | < 0.001 |
| Diabetes                 | 1.76(1.68-1.84) | < 0.001 | 1.30(1.25-1.36) | < 0.001 |
| Dyslipidemia             | 2.03(1.94-2.13) | < 0.001 | 1.44(1.38-1.49) | < 0.001 |
| AF                       | 1.98(1.76-2.24) | < 0.001 | 1.28(1.13-1.44) | < 0.001 |
| TIA                      | 1.97(1.85-2.11) | < 0.001 | 2.92(2.77-3.08) | < 0.001 |
| Family history of CHD    | 4.89(4.63-5.17) | < 0.001 | 1.09(1.03-1.16) | 0.004   |
| Family history of stroke | 1.60(1.52-1.68) | < 0.001 | 4.33(4.16-4.50) | < 0.001 |
| Regular drinking         | 1.10(1.03-1.18) | 0.007   | .....           | .....   |

171 CHD, coronary heart disease; BMI, body mass index; AF, atrial fibrillation; TIA, transient ischemic attack

### 172 3.3 Distribution differences of common risk factors between CHD and stroke

173 After the exclusion of 1,988 patients with both CHD and stroke, there were 8,666 patients with CHD  
 174 and 14,001 patients with stroke separately. In multivariate logistic regression analysis, CVD was  
 175 taken as the dependent variable (stroke was defined as 1, whereas CHD was defined as 0) and the 13  
 176 common risk factors were taken as independent variables. The results showed that 11 of 13 risk  
 177 factors (except age and lack of exercise) revealed differences in the distribution between CHD and  
 178 stroke (Table 4). The risk factors with OR>1 were more frequently detected in stroke patients, and  
 179 others with OR<1 may be more frequently detected in CHD patients. The family history of stroke,  
 180 male, rural area, TIA and hypertension were more closely associated with stroke, while the family  
 181 history of CHD, AF, diabetes, dyslipidemia, smoking and overweight/obesity indicated stronger  
 182 relationship with CHD. Figure 2 displayed the distribution differences of risk factors for stroke and  
 183 CHD.

184 Table 4. Multivariate logistic regression analysis of common risk factors distribution between CHD and stroke

| Characteristics          | OR   | 95%CI     | P value |
|--------------------------|------|-----------|---------|
| Family history of stroke | 2.30 | 2.15-2.45 | < 0.001 |
| Sex (male)               | 1.92 | 1.80-2.05 | < 0.001 |
| Region (rural)           | 1.70 | 1.60-1.80 | < 0.001 |
| TIA                      | 1.41 | 1.30-1.54 | < 0.001 |
| Hypertension             | 1.28 | 1.19-1.38 | < 0.001 |
| BMI                      | 0.90 | 0.86-0.93 | < 0.001 |
| Smoking                  | 0.79 | 0.73-0.85 | < 0.001 |

|                       |      |           |         |
|-----------------------|------|-----------|---------|
| Dyslipidemia          | 0.76 | 0.72-0.81 | < 0.001 |
| Diabetes              | 0.76 | 0.71-0.81 | < 0.001 |
| AF                    | 0.60 | 0.51-0.71 | < 0.001 |
| Family history of CHD | 0.25 | 0.23-0.27 | < 0.001 |

185 CHD, coronary heart disease; TIA, transient ischemic attack; BMI, body mass index; AF, atrial fibrillation

186 Subgroup analysis by gender and region showed that the distribution differences of risk factors  
 187 between CHD and stroke also existed in different gender and region groups (Figure 3). The risk  
 188 factors that were more closely related to stroke were the same across different genders or regions  
 189 (Table 5, Table 6). Smoking and lack of exercise were more closely related to CHD than stroke in the  
 190 female population, but not in the male population (Table 5). AF and lack of exercise were more  
 191 closely related to CHD than stroke in rural area, but not in urban area (Table 6).

192 Table 5. Subgroup Analysis of Distribution Differences by gender

| Characteristics          | Women           |         | Men             |         |
|--------------------------|-----------------|---------|-----------------|---------|
|                          | OR (95%CI)      | P value | OR (95%CI)      | P value |
| Family history of stroke | 2.19(2.01-2.39) | < 0.001 | 2.44(2.20-2.71) | < 0.001 |
| Region (rural)           | 1.61(1.49-1.73) | < 0.001 | 1.84(1.68-2.01) | < 0.001 |
| TIA                      | 1.35(1.21-1.51) | < 0.001 | 1.52(1.32-1.76) | < 0.001 |
| Hypertension             | 1.20(1.08-1.32) | < 0.001 | 1.39(1.25-1.56) | < 0.001 |
| BMI                      | 0.91(0.86-0.95) | < 0.001 | 0.88(0.83-0.93) | < 0.001 |
| Diabetes                 | 0.76(0.70-0.83) | < 0.001 | 0.75(0.68-0.83) | < 0.001 |
| Dyslipidemia             | 0.81(0.75-0.88) | < 0.001 | 0.71(0.65-0.77) | < 0.001 |
| AF                       | 0.73(0.59-0.91) | 0.005   | 0.47(0.36-0.61) | < 0.001 |
| Family history of CHD    | 0.25(0.23-0.28) | < 0.001 | 0.24(0.21-0.27) | < 0.001 |
| Smoking                  | 0.47(0.41-0.55) | < 0.001 | .....           | .....   |
| Lack of exercise         | 0.92(0.85-0.99) | 0.036   | .....           | .....   |

193 TIA, transient ischemic attack; BMI, body mass index; AF, atrial fibrillation; CHD, coronary heart disease

194 Table 6. Subgroup Analysis of Distribution Differences by region

| Characteristics          | Rural           |         | Urban           |         |
|--------------------------|-----------------|---------|-----------------|---------|
|                          | OR (95%CI)      | P value | OR (95%CI)      | P value |
| Sex (male)               | 2.51(2.27-2.79) | < 0.001 | 1.56(1.43-1.70) | < 0.001 |
| Family history of stroke | 2.10(1.91-2.32) | < 0.001 | 2.44(2.23-2.66) | < 0.001 |
| TIA                      | 1.31(1.15-1.48) | < 0.001 | 1.51(1.34-1.70) | < 0.001 |
| Hypertension             | 1.24(1.11-1.39) | < 0.001 | 1.32(1.19-1.45) | < 0.001 |
| BMI                      | 0.92(0.87-0.97) | 0.002   | 0.87(0.83-0.92) | < 0.001 |
| Dyslipidemia             | 0.77(0.71-0.84) | < 0.001 | 0.75(0.69-0.82) | < 0.001 |
| Diabetes                 | 0.73(0.66-0.80) | < 0.001 | 0.78(0.72-0.85) | < 0.001 |
| Family history of CHD    | 0.21(0.18-0.23) | < 0.001 | 0.28(0.25-0.32) | < 0.001 |
| Lack of exercise         | 0.88(0.81-0.96) | 0.004   | .....           | .....   |
| Smoking                  | 0.55(0.49-0.61) | < 0.001 | .....           | .....   |
| AF                       | 0.38(0.30-0.48) | < 0.001 | .....           | .....   |

1  
2 196 TIA, transient ischemic attack; BMI, body mass index; CHD, coronary heart disease; AF, atrial fibrillation

## 3 4 197 **4 Discussion**

5  
6 198 The China National Stroke Screening Survey is a large sample size, nationwide community  
7 199 population-based cluster sampling survey, which can reflect the distribution of CVD and risk factors  
8 200 in real world. This study showed that CHD and stroke had many common risk factors, while the  
9 201 distribution of these risk factors between CHD and stroke were substantial differences.

### 10 11 202 **4.1 Necessity of comprehensive screening and prevention of CVD in China**

12  
13 203 As revealed in the present study, there were substantial similarities in the association of risk factors  
14 204 with CHD and stroke, including hypertension, diabetes, dyslipidemia, AF, TIA, smoking,  
15 205 overweight/obesity, lack of exercise, family history of CVD, age, sex and region. An enormous  
16 206 amount of studies has confirmed that these traditional risk factors are related to CVD<sup>7, 21</sup>, although  
17 207 the pathophysiological mechanisms leading to CVD are not identical. At present, China has a large  
18 208 number of high-risk groups of CVD, including 244.5 million hypertension, 113.9 million diabetes,  
19 209 358.3 million dyslipidemia, and 7.7 million atrial fibrillation<sup>22-25</sup>. In order to reduce the disease  
20 210 burden caused by CVD, the Chinese government launched the screening and prevention programs for  
21 211 CHD and stroke<sup>19, 26</sup>, respectively. Since CHD and stroke have many common risk factors, we  
22 212 believe that it is necessary to carry out comprehensive screening and prevention of CVD. We found  
23 213 that hypertension is the most important risk factor for both CHD and stroke. Although the latest  
24 214 survey shows that the awareness rate, treatment rate and control rate of hypertension in China have  
25 215 been improved, but compared with the developed countries is still very low<sup>21, 22</sup>. These results  
26 216 suggest that interventions for hypertension are still a top priority for CVD prevention in China.

### 27 28 29 30 217 **4.2 Heterogeneity of risk factor distribution**

31  
32 218 The distribution of most risk factors involved in this study was significantly different between CHD  
33 219 and stroke. Family history of CVD was the most different risk factor for CHD and stroke among all  
34 220 risk factors. Men were more closely associated with stroke, while women were more closely  
35 221 associated with CHD. Geographically, stroke was more likely in rural population and CHD more  
36 222 likely in urban population. Among the risk factors that can be intervened, AF, dyslipidemia, diabetes,  
37 223 smoking, overweight/obesity were more closely related to CHD, while TIA and hypertension were  
38 224 more closely related to stroke.

39  
40  
41 225 The heterogeneity of the relationship between specific risk factors and different types of CVD may  
42 226 be related to the pathophysiological mechanisms of these risk factors in different types of CVD. As  
43 227 expected, we found that hypertension is more related to stroke, while dyslipidemia is more related to  
44 228 CHD, which is consistent with previous studies<sup>11, 13, 14</sup>. The possible reasons are that hypertension  
45 229 increases the risk of ischemic stroke and hemorrhagic stroke at the same time, while dyslipidemia  
46 230 shows the opposite effect<sup>21</sup>. On the pathophysiological mechanism, the strong association between  
47 231 hypertension and stroke might be explained by the relationship between hypertension and cerebral  
48 232 small vessel disease or atrial fibrillation<sup>13, 27</sup>. Conversely, the relationship of different lipid subtypes  
49 233 with ischemic and hemorrhagic stroke are different. Hypercholesterolemia increases the risk of  
50 234 ischemic stroke but reduces the risk of hemorrhagic stroke. Higher level of low-density lipoprotein  
51 235 cholesterol seems to be associated with lower risk of hemorrhagic stroke, however high-density  
52 236 lipoprotein cholesterol level seems to be positively associated with risk of intracerebral hemorrhage<sup>28</sup>.  
53 237 <sup>29</sup>. In addition, diabetes and smoking were associated with ischemic stroke, but not predictive of  
54 238 hemorrhagic stroke<sup>11</sup>. This may be the reason why they are more closely related to CHD. Contrary to

1  
2 239 expectations, atrial fibrillation is more closely associated with CHD than stroke. The possible reason  
3 240 is that CHD increases the risk of atrial fibrillation, while stroke does not increase the risk of atrial  
4 241 fibrillation<sup>30, 31</sup>.

6 242 Elucidating the underlying mechanism for the heterogeneity of specific risk factors distribution on  
7 243 CVD types requires further work. Only a few studies focused on the differences of risk factors  
8 244 between CHD and stroke in a same cohort in the past<sup>10-13</sup>. There was a great heterogeneity among  
9 245 these studies, for example, the Women's Health Initiative Observational Study included only female  
10 246 and sample size is small<sup>11</sup>, the Physicians' Health Study included only male<sup>10</sup>, the Rotterdam study  
11 247 just compared gender differences in one area of the population<sup>12</sup>, the EPIC-Norfolk Study included  
12 248 only three risk factors (LDL-c, systolic blood pressure and smoking)<sup>13</sup>. Findings in our study were  
13 249 consistent with those reported in EPIC-Norfolk Study and Women's Health Initiative Observational  
14 250 Study. The EPIC-Norfolk Study suggested that hypertension was intimately associated with stroke,  
15 251 and dyslipidemia showed stronger relationship with CHD<sup>13</sup>. Meanwhile, Women's Health Initiative  
16 252 Observational Study revealed that BMI, smoking, diabetes, family history of CHD and  
17 253 hypercholesterolemia were associated with CHD, while hypertension was related to stroke<sup>11</sup>. Unlike  
18 254 our results, the Physicians' Health Study indicated no difference in the distribution of risk factors  
19 255 such as hypertension, hypercholesterolemia, diabetes, smoking and physical exercise between CHD  
20 256 and stroke<sup>10</sup>. Contrary to our results, the Rotterdam study showed that females were more likely to  
21 257 have stroke, while males had higher risk of CHD<sup>12</sup>. The reason for this huge difference may be the  
22 258 different race, age and occupation backgrounds included in different studies. Besides, the  
23 259 geographical environment and climate of different countries may also play an important role<sup>32</sup>.  
24 260 Different countries should formulate corresponding prevention and control measures for CVD  
25 261 according to the prevalence and distribution of risk factors in their own countries.

### 30 262 4.3 Implications

32 263 Our results could suggest that differences may exist in the efficacy of improving specific risk factors  
33 264 across CVD types. The heterogeneity in the association between particular risk factors and specific  
34 265 CVD types demonstrated in the current study could improve the selection of high-risk patients for  
35 266 population-based screening programs. For example, for women with a family history of CHD, more  
36 267 attention should be paid to the prevention of CHD, and for men with a family history of stroke, more  
37 268 stroke should be prevented. In addition, the results of this study are helpful for clinical studies to  
38 269 select appropriate endpoint indicators. The specific types of CVD events may vary depending on the  
39 270 risk factors for clinical intervention. In the study of lipid lowering, the risk of CHD should be paid  
40 271 more attention, while the study of blood pressure lowering should pay more attention to the risk of  
41 272 stroke.

45 273 There are several limitations in this study. Firstly, the judgment of CVD events was mainly based  
46 274 on self-reported history. In order to reduce the recall bias, each CVD event should be confirmed by a  
47 275 specialist in cardiology or neurology to make the diagnosis as accurate as possible. Secondly, this  
48 276 study was a cross-sectional survey that can only indicate the correlation between risk factors and  
49 277 CVD, without the ability to reflect the causal relationship. However, this study has a large sample  
50 278 size and is based on a nationwide cluster sampling survey, which can explain the relationship  
51 279 between specific risk factors and CVD types to a certain extent.

## 54 280 5 Conclusion

56 281 Although CHD and stroke had many common risk factors, the distribution of these risk factors  
57 282 between CHD and stroke were substantial differences. More specific prevention and control

283 measures should be formulated according to the distribution differences of risk factors related to  
284 CVD.

## 285 **6 Contributorship statement**

286 LD W and YM X contributed to research design and the revision of this manuscript; YP L  
287 contributed to research design, data collection and writing of this manuscript; L Y, Y S, YS L, J L  
288 and SH S contributed to data collection and processing; AR W, L Z, Y G, CS T contributed to data  
289 collection and the revision of the manuscript; all authors read and approved the final manuscript.

## 290 **7 Competing interests**

291 None.

## 292 **8 Funding**

293 This study was supported by grants from the National Key R&D Program of China  
294 (2018YFC1311303), the Non-profit Central Research Institute Fund of Chinese Academy of Medical  
295 Sciences (2020-PT310-01) and the Young Elite Scientists Sponsorship Program by Henan  
296 Association for Science and Technology (2022HYTP048).

## 297 **9 Data sharing**

298 No additional data available.

## 299 **10 Acknowledgments**

300 We thank all the participants of the CNSSS and all the colleagues from 256 sub-centers in 31  
301 provinces who worked very hard to ensure the accuracy of the data.

## 302 **11 Ethics Approval**

303 The study was approved by the ethics committee of the First Affiliated Hospital of Zhengzhou  
304 University (2021-KY-0067-001).

## 305 **12 References**

- 306 1. Roth GA, Mensah GA, Johnson CO, et al. Global Burden of Cardiovascular Diseases and Risk Factors, 1990-2019: Update  
307 From the GBD 2019 Study. *J Am Coll Cardiol* 2020;76:2982-3021.
- 308 2. Global, regional, and national burden of stroke and its risk factors, 1990-2019: a systematic analysis for the Global Burden of  
309 Disease Study 2019. *Lancet Neurol* 2021;20:795-820.
- 310 3. Global burden of 369 diseases and injuries in 204 countries and territories, 1990-2019: a systematic analysis for the Global  
311 Burden of Disease Study 2019. *Lancet* 2020;396:1204-22.
- 312 4. Irawati S, Wasir R, Floriaan Schmidt A, et al. Long-term incidence and risk factors of cardiovascular events in Asian  
313 populations: systematic review and meta-analysis of population-based cohort studies. *Curr Med Res Opin* 2019;35:291-9.
- 314 5. Virani SS, Alonso A, Aparicio HJ, et al. Heart Disease and Stroke Statistics-2021 Update: A Report From the American Heart  
315 Association. *Circulation* 2021;143:e254-254e743.
- 316 6. Zhao D, Liu J, Wang M, et al. Epidemiology of cardiovascular disease in China: current features and implications. *Nat Rev*  
317 *Cardiol* 2019;16:203-12.

- 1  
2 318  
3 319  
4 320
- 5 321  
6 322  
7
- 8 323  
9 324  
10
- 11 325  
12 326  
13
- 14 327  
15 328
- 16 329  
17 330  
18
- 19 331  
20 332  
21
- 22 333  
23 334
- 24 335  
25 336  
26
- 27 337  
28 338  
29
- 30 339  
31 340  
32
- 33 341  
34 342
- 35 343  
36 344  
37
- 38 345  
39 346  
40
- 41 347  
42 348  
43 349
- 44 350  
45 351  
46
- 47 352  
48 353  
49
- 50 354  
51 355
- 52 356  
53 357  
54
- 55 358  
56 359  
57  
58  
59  
60
7. Goff DC Jr, Lloyd-Jones DM, Bennett G, *et al.* 2013 ACC/AHA guideline on the assessment of cardiovascular risk: a report of the American College of Cardiology/American Heart Association Task Force on Practice Guidelines. *Circulation* 2014;129:S49-73.
  8. Yang X, Li J, Hu D, *et al.* Predicting the 10-Year Risks of Atherosclerotic Cardiovascular Disease in Chinese Population: The China-PAR Project (Prediction for ASCVD Risk in China). *Circulation* 2016;134:1430-40.
  9. Pylypchuk R, Wells S, Kerr A, *et al.* Cardiovascular disease risk prediction equations in 400 000 primary care patients in New Zealand: a derivation and validation study. *Lancet* 2018;391:1897-907.
  10. Glynn RJ, Rosner B. Comparison of risk factors for the competing risks of coronary heart disease, stroke, and venous thromboembolism. *Am J Epidemiol* 2005;162:975-82.
  11. Leening M, Cook NR, Franco OH, *et al.* Comparison of Cardiovascular Risk Factors for Coronary Heart Disease and Stroke Type in Women. *J Am Heart Assoc* 2018;7:e007514.
  12. Leening MJ, Ferket BS, Steyerberg EW, *et al.* Sex differences in lifetime risk and first manifestation of cardiovascular disease: prospective population based cohort study. *BMJ* 2014;349:g5992.
  13. Stoekenbroek RM, Boekholdt SM, Luben R, *et al.* Heterogeneous impact of classic atherosclerotic risk factors on different arterial territories: the EPIC-Norfolk prospective population study. *Eur Heart J* 2016;37:880-9.
  14. Simons LA, Simons J, Friedlander Y, *et al.* A comparison of risk factors for coronary heart disease and ischaemic stroke: the Dubbo study of Australian elderly. *Heart Lung Circ* 2009;18:330-3.
  15. Guan T, Ma J, Li M, *et al.* Rapid transitions in the epidemiology of stroke and its risk factors in China from 2002 to 2013. *Neurology* 2017;89:53-61.
  16. Fu W, Cao S, Liu B, *et al.* Association of general and central adiposity with blood pressure among Chinese adults: results from the China National Stroke Prevention Project. *J Hypertens* 2018;36:2406-13.
  17. Longde W, Ling Y, Yang H, *et al.* Fixed-dose combination treatment after stroke for secondary prevention in China: a national community-based study. *Stroke* 2015;46:1295-300.
  18. Wang X, Fu Q, Song F, *et al.* Prevalence of atrial fibrillation in different socioeconomic regions of China and its association with stroke: Results from a national stroke screening survey. *Int J Cardiol* 2018;271:92-7.
  19. Chao BH, Yan F, Hua Y, *et al.* Stroke prevention and control system in China: CSPPC-Stroke Program. *Int J Stroke* 2021;16:265-72.
  20. Wang X, Li W, Song F, *et al.* Carotid Atherosclerosis Detected by Ultrasonography: A National Cross-Sectional Study. *J Am Heart Assoc* 2018;7.
  21. Arnett DK, Blumenthal RS, Albert MA, *et al.* 2019 ACC/AHA Guideline on the Primary Prevention of Cardiovascular Disease: A Report of the American College of Cardiology/American Heart Association Task Force on Clinical Practice Guidelines. *Circulation* 2019;140:e596-596e646.
  22. Wang Z, Chen Z, Zhang L, *et al.* Status of Hypertension in China: Results From the China Hypertension Survey, 2012-2015. *Circulation* 2018;137:2344-56.
  23. Li Y, Teng D, Shi X, *et al.* Prevalence of diabetes recorded in mainland China using 2018 diagnostic criteria from the American Diabetes Association: national cross sectional study. *BMJ* 2020;369:m997.
  24. Pan L, Yang Z, Wu Y, *et al.* The prevalence, awareness, treatment and control of dyslipidemia among adults in China. *Atherosclerosis* 2016;248:2-9.
  25. Wang Z, Chen Z, Wang X, *et al.* The Disease Burden of Atrial Fibrillation in China from a National Cross-sectional Survey. *Am J Cardiol* 2018;122:793-8.
  26. Lu J, Xuan S, Downing NS, *et al.* Protocol for the China PEACE (Patient-centered Evaluative Assessment of Cardiac Events) Million Persons Project pilot. *BMJ Open* 2016;6:e010200.



- 1  
2 360 27. Sörös P, Whitehead S, Spence JD, *et al.* Antihypertensive treatment can prevent stroke and cognitive decline. *Nat Rev Neurol*  
3 361 2013;9:174-8.
- 4 362 28. Glasser SP, Mosher A, Howard G, *et al.* What is the association of lipid levels and incident stroke. *Int J Cardiol* 2016;220:890-  
5 363 4.
- 6  
7 364 29. Wang X, Dong Y, Qi X, *et al.* Cholesterol levels and risk of hemorrhagic stroke: a systematic review and meta-analysis. *Stroke*  
8 365 2013;44:1833-9.
- 9  
10 366 30. Jabre P, Jouven X, Adnet F, *et al.* Atrial fibrillation and death after myocardial infarction: a community study. *Circulation*  
11 367 2011;123:2094-100.
- 12  
13 368 31. January CT, Wann LS, Alpert JS, *et al.* 2014 AHA/ACC/HRS guideline for the management of patients with atrial fibrillation:  
14 369 a report of the American College of Cardiology/American Heart Association Task Force on Practice Guidelines and the Heart  
15 370 Rhythm Society. *J Am Coll Cardiol* 2014;64:e1-76.
- 16 371 32. Hadley MB, Vedanthan R, Fuster V. Air pollution and cardiovascular disease: a window of opportunity. *Nat Rev Cardiol*  
17 372 2018;15:193-4.
- 18  
19 373  
20  
21  
22  
23  
24  
25  
26  
27  
28  
29  
30  
31  
32  
33  
34  
35  
36  
37  
38  
39  
40  
41  
42  
43  
44  
45  
46  
47  
48  
49  
50  
51  
52  
53  
54  
55  
56  
57  
58  
59  
60

## Figure Legends

### **Figure 1. The rank of common risk factors of CHD and stroke based on OR value.**

The solid line indicates that the ranking of risk factors goes down, while the dotted line indicates that the ranking goes up.

Abbreviation: CHD = coronary heart disease; AF = atrial fibrillation; TIA = transient ischemic attack; BMI = body mass index.

### **Figure 2. The forest plots of distribution differences of common risk factors between CHD and stroke.**

Abbreviation: TIA = transient ischemic attack; BMI = body mass index; AF = atrial fibrillation; CHD = coronary heart disease.

### **Figure 3. Subgroup analysis of distribution differences based on sex and region.**

Abbreviation: TIA = transient ischemic attack; BMI = body mass index; AF = atrial fibrillation; CHD = coronary heart disease.

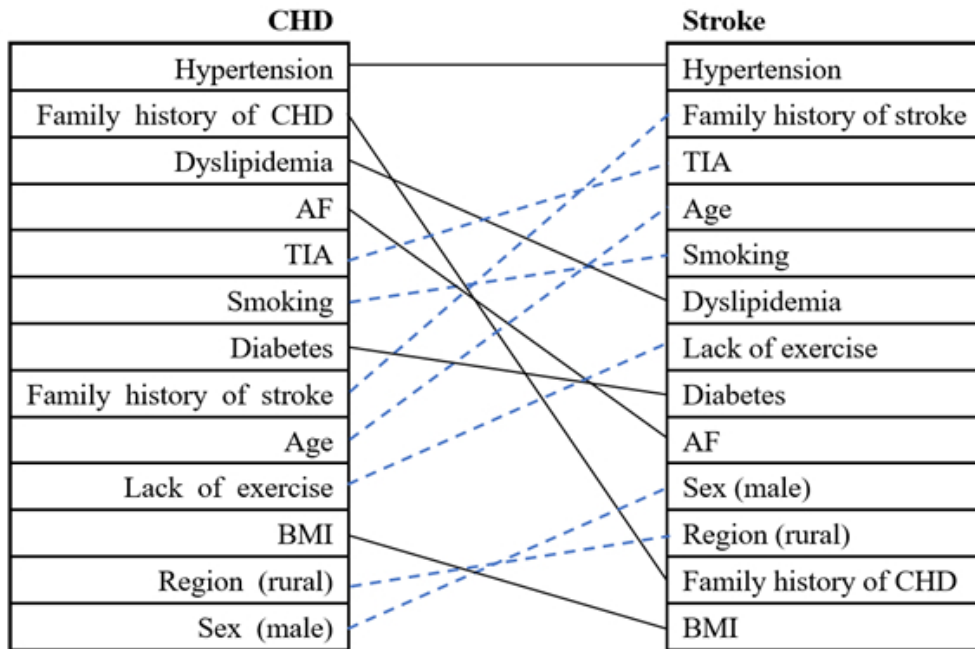

Figure 1. The rank of common risk factors of CHD and stroke based on OR value

101x67mm (144 x 144 DPI)

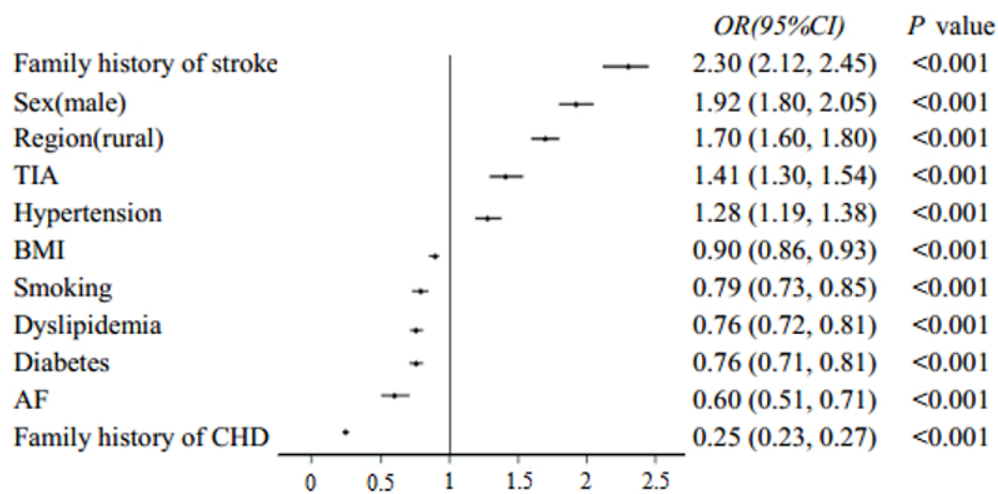

Figure 2. The forest plots of distribution differences of common risk factors between CHD and stroke

141x69mm (144 x 144 DPI)

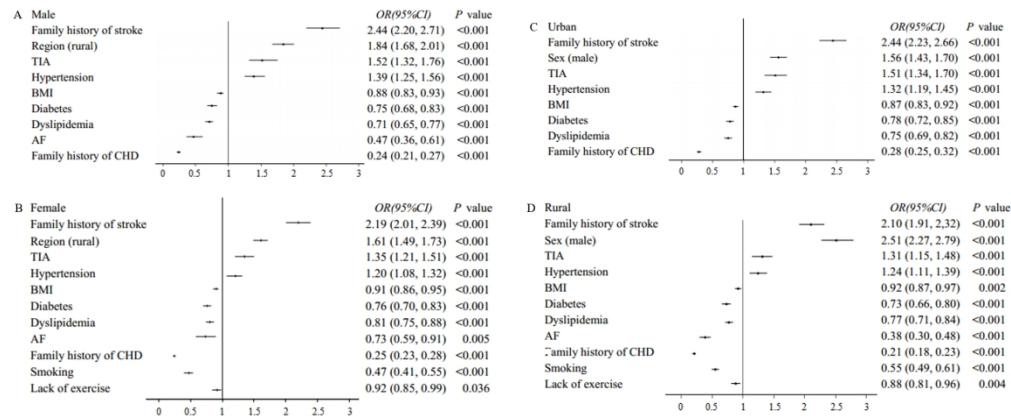

367x150mm (144 x 144 DPI)

# BMJ Open

## Distribution of Risk Factors Differ from Coronary Heart Disease and Stroke in China: A National Population Survey

|                                 |                                                                                                                                                                                                                                                                                                                                                                                                                                                                                                                                                                                                                                                                                                                                                                                                                                                                                                                                                                                                                                        |
|---------------------------------|----------------------------------------------------------------------------------------------------------------------------------------------------------------------------------------------------------------------------------------------------------------------------------------------------------------------------------------------------------------------------------------------------------------------------------------------------------------------------------------------------------------------------------------------------------------------------------------------------------------------------------------------------------------------------------------------------------------------------------------------------------------------------------------------------------------------------------------------------------------------------------------------------------------------------------------------------------------------------------------------------------------------------------------|
| Journal:                        | <i>BMJ Open</i>                                                                                                                                                                                                                                                                                                                                                                                                                                                                                                                                                                                                                                                                                                                                                                                                                                                                                                                                                                                                                        |
| Manuscript ID                   | bmjopen-2022-065970.R1                                                                                                                                                                                                                                                                                                                                                                                                                                                                                                                                                                                                                                                                                                                                                                                                                                                                                                                                                                                                                 |
| Article Type:                   | Original research                                                                                                                                                                                                                                                                                                                                                                                                                                                                                                                                                                                                                                                                                                                                                                                                                                                                                                                                                                                                                      |
| Date Submitted by the Author:   | 01-Nov-2022                                                                                                                                                                                                                                                                                                                                                                                                                                                                                                                                                                                                                                                                                                                                                                                                                                                                                                                                                                                                                            |
| Complete List of Authors:       | Li, Yapeng; The First Affiliated Hospital of Zhengzhou University, Department of Neurology<br>Yin, Ling; Chinese PLA General Hospital<br>Shen, Ying; Xuanwu Hospital<br>Wang, Anran; The First Affiliated Hospital of Zhengzhou University, Department of Neurology<br>Zhou, Lue; The First Affiliated Hospital of Zhengzhou University, Department of Neurology<br>Gao, Yuan; The First Affiliated Hospital of Zhengzhou University, Department of Neurology<br>Li, Yusheng; The First Affiliated Hospital of Zhengzhou University, Department of Neurology<br>Lu, Jie; Zhengzhou University, Department of Epidemiology and Health Statistics<br>shi, songhe; Zhengzhou University, Department of Epidemiology and Biostatistics<br>Tian, Chuansheng; Chinese Preventive Medicine Association<br>Xu, Yuming; The First Affiliated Hospital of Zhengzhou University, Department of Neurology<br>Wang, Longde; The First Affiliated Hospital of Zhengzhou University, Department of Neurology; Chinese Preventive Medicine Association |
| <b>Primary Subject Heading</b>: | Public health                                                                                                                                                                                                                                                                                                                                                                                                                                                                                                                                                                                                                                                                                                                                                                                                                                                                                                                                                                                                                          |
| Secondary Subject Heading:      | Cardiovascular medicine, Epidemiology, Neurology                                                                                                                                                                                                                                                                                                                                                                                                                                                                                                                                                                                                                                                                                                                                                                                                                                                                                                                                                                                       |
| Keywords:                       | Coronary heart disease < CARDIOLOGY, Stroke < NEUROLOGY, Cardiac Epidemiology < CARDIOLOGY, EPIDEMIOLOGY, PUBLIC HEALTH                                                                                                                                                                                                                                                                                                                                                                                                                                                                                                                                                                                                                                                                                                                                                                                                                                                                                                                |
|                                 |                                                                                                                                                                                                                                                                                                                                                                                                                                                                                                                                                                                                                                                                                                                                                                                                                                                                                                                                                                                                                                        |

SCHOLARONE™  
Manuscripts



I, the Submitting Author has the right to grant and does grant on behalf of all authors of the Work (as defined in the below author licence), an exclusive licence and/or a non-exclusive licence for contributions from authors who are: i) UK Crown employees; ii) where BMJ has agreed a CC-BY licence shall apply, and/or iii) in accordance with the terms applicable for US Federal Government officers or employees acting as part of their official duties; on a worldwide, perpetual, irrevocable, royalty-free basis to BMJ Publishing Group Ltd ("BMJ") its licensees and where the relevant Journal is co-owned by BMJ to the co-owners of the Journal, to publish the Work in this journal and any other BMJ products and to exploit all rights, as set out in our [licence](#).

The Submitting Author accepts and understands that any supply made under these terms is made by BMJ to the Submitting Author unless you are acting as an employee on behalf of your employer or a postgraduate student of an affiliated institution which is paying any applicable article publishing charge ("APC") for Open Access articles. Where the Submitting Author wishes to make the Work available on an Open Access basis (and intends to pay the relevant APC), the terms of reuse of such Open Access shall be governed by a Creative Commons licence – details of these licences and which [Creative Commons](#) licence will apply to this Work are set out in our licence referred to above.

Other than as permitted in any relevant BMJ Author's Self Archiving Policies, I confirm this Work has not been accepted for publication elsewhere, is not being considered for publication elsewhere and does not duplicate material already published. I confirm all authors consent to publication of this Work and authorise the granting of this licence.

# Distribution of Risk Factors Differ from Coronary Heart Disease and Stroke in China: A National Population Survey

1 **Yapeng Li<sup>1,2</sup>, Ling Yin<sup>3</sup>, Ying Shen<sup>4</sup>, Anran Wang<sup>1,2</sup>, Lue Zhou<sup>1,2</sup>, Yuan Gao<sup>1,2</sup>, Yusheng Li<sup>1,2</sup>,**  
2 **Jie Lu<sup>5</sup>, Songhe Shi<sup>5</sup>, Chuansheng Tian<sup>6</sup>, Yuming Xu<sup>1,2\*</sup>, Longde Wang<sup>1,6,7\*</sup>; on behalf of the**  
3 **China National Stroke Screening Survey investigators**

4 <sup>1</sup> Department of Neurology, the First Affiliated Hospital of Zhengzhou University, Zhengzhou, China

5 <sup>2</sup> National Health Commission Key Laboratory of Prevention and treatment of Cerebrovascular  
6 Diseases

7 <sup>3</sup> Department of Neurology, the Chinese PLA General Hospital, Beijing, China

8 <sup>4</sup> Department of Traditional Chinese Medicine, Xuanwu Hospital of Capital Medical University,  
9 Beijing, China

10 <sup>5</sup> Department of Epidemiology and Health Statistics, College of Public Health, Zhengzhou  
11 University, Zhengzhou, China

12 <sup>6</sup> Chinese Preventive Medicine Association, Beijing, China

13 <sup>7</sup> Stroke Prevention Project Office, National Health Commission of the People's Republic of China,  
14 Beijing, China

## \* Correspondence:

15 Longde Wang, MD, PhD, Department of Neurology, the First Affiliated Hospital of Zhengzhou  
16 University; Chinese Preventive Medicine Association, No.25 Huaweili Road, Chaoyang District,  
17 Beijing, China, 100021. Tel./Fax: +86 10 84039879; Email: longde\_wang@yeah.net

18 Or Yuming Xu, MD, PhD, Department of Neurology, the First Affiliated Hospital of Zhengzhou  
19 University, No.1 Eastern Jianshe Road, Erqi District, Zhengzhou, Henan Province, China, 450052.  
20 Tel./Fax: +86 371 66862132; E-mail: xuyuming@zzu.edu.cn

21 The number of references, abstract count and word count are respectively 32, 283 and 3005.

22 **Keywords: Coronary heart disease, Stroke, Cardiovascular diseases, Risk factors,**  
23 **Heterogeneity**

## Abstract

24 **Objectives:** This study aimed to explore the distribution differences of common risk factors between  
25 coronary heart disease (CHD) and stroke in China.

26 **Setting:** The China National Stroke Screening Survey is a cluster sampling survey based on a  
27 nationwide general community population, adopting multi-stage stratified sampling method and  
28 covering all 31 provinces in China mainland.

29 **Participants:** A total number of 725 707 people aged 40 years and above were included in the study.

30 **Primary and secondary outcome measures:** The basic demographic information, lifestyle  
31 behavior, physical examination, traditional risk factors, family history of cardiovascular disease



(CVD) and CVD events were collected. Risk factors of CHD and stroke were explored and analyzed in the whole investigated population to identify the common risk factors. Multivariate logistic regression analysis was used to analyze the distribution difference of risk factors between CHD and stroke.

**Results:** There were 13 variables associated with CHD and stroke, in which 11 variables revealed differences in the distribution between CHD and stroke. Family history of stroke (OR: 2.30; 95% CI, 2.15-2.45), male (OR: 1.92; 95% CI, 1.80-2.05), rural areas (OR: 1.70; 95% CI, 1.60-1.80), transient ischemic attack (OR: 1.41; 95% CI, 1.30-1.54) and hypertension (OR: 1.28; 95% CI, 1.19-1.38) indicated significantly stronger association with stroke, while family history of CHD (OR: 0.25; 95% CI, 0.23-0.27), atrial fibrillation (OR: 0.60; 95% CI, 0.51-0.71), diabetes (OR: 0.76; 95% CI, 0.71-0.81), dyslipidemia (OR: 0.76; 95% CI, 0.72-0.81), smoking (OR: 0.79; 95% CI, 0.73-0.85) and overweight/obesity (OR: 0.90; 95% CI, 0.86-0.93) had closer relationship with CHD.

**Conclusions:** The distribution of risk factors for CHD and stroke were substantial differences. More specific prevention and control measures should be formulated according to the distribution differences of risk factors related to CVD.

### Strengths and limitations of this study

- The China National Stroke Screening Survey is a nationwide cross-sectional study based on general community population.
- CHD and stroke had many common risk factors, while the distribution of specific risk factors between CHD and stroke were substantial differences.
- More specific prevention and control measures should be formulated according to the distribution differences of risk factors related to CVD.

## 1 Introduction

Cardiovascular disease (CVD) is the leading cause of death in China and worldwide[1,2]. Previous studies have shown the significant regional and ethnic differences in the incidence and mortality of CVD[3-6]. For example, coronary heart disease (CHD) is the leading cause of death in most Western countries, while stroke is more common in China[4-6]. The distributional differences of specific risk factors for different CVD types may be an important reason for this phenomenon. To clarify the relationship between different risk factors and the first manifestation of CVD can help us better understand the pathophysiological mechanism of different CVD, as well as the potential benefits of controlling these risk factors.

Many previous studies have considered the CHD and stroke as a whole to explore common risk factors of both[7-9]. Only a few studies investigated the differences of risk factors between CHD and stroke in a same cohort[10-14], some of which just enrolled male or female populations[10,11], or only reported the difference of a single risk factor[12], or conducted based on a small sample size[14]. There is still lack of large sample size, representative population-based research about whether differences exist in the distribution of risk factors between CHD and stroke. The China National Stroke Screening Survey (CNSSS) is a nationwide cross-sectional study based on general community population. By analyzing the data collected from the CNSSS, this study aimed to explore the specific common risk factors of CHD and stroke and whether there are differences in the distribution of these specific risk factors between CHD and stroke.

## 2 Materials and Methods

## 2.1 Study design

The CNSSS is a cluster sampling survey based on a nationwide general community population, adopting multi-stage stratified sampling method and covering all 31 provinces in China mainland. The initial stages of CNSSS had been described in our previous publications[15-19].

The CNSSS used a third-stage stratified cluster sampling method. In the first stage, 128 prefecture-level cities were selected by 31 provinces according to the different proportion of the Sixth National Population Census of China in 2010. In the second stage, one urban street and one rural town were selected from each prefecture-level city, respectively. In the third stage, an urban community and a rural village were selected from each urban street and rural town. All residents aged 40 years or older were surveyed during the primary screening, and the response rate of each place was required to be no less than 85%. Ultimately, 828 764 subjects from 256 communities and villages participated in the survey, each of whom signed a written informed consent.

## 2.2 Data collection

A questionnaire survey which conducted by trained staff was performed based on the population aged 40 and above in the sampled communities and towns by adopting the unified epidemiological survey scale of CVD. The project developed a data reporting information platform, in which the information of the paper questionnaire was reported uniformly by trained staff of each sub-center. The following variables were analyzed for the present study: (1) basic demographic information: sex, age and place of residence; (2) lifestyle behavior: smoking, alcohol consumption, and exercise; (3) physical examination: blood pressure, height, weight, body mass index (BMI); (4) traditional risk factors: hypertension, diabetes, dyslipidemia, atrial fibrillation (AF), transient ischemic attack (TIA), family history of CHD or stroke; (5) CVD events: CHD, stroke.

## 2.3 Definition of cardiovascular diseases and risk factors

Stroke was diagnosed by a combination of self-reported history, medical records and the judgment of professional doctors according to WHO criteria. The diagnosis of CHD included history of angina pectoris, myocardial infarction, as well as previous history of coronary artery bypass grafting or stent implantation, and be confirmed by a specialist. Blood pressure, fasting blood sugar, fasting blood lipids and BMI were measured on site for all survey subjects[19,20]. Hypertension was diagnosed by self-reported history of hypertension, or current use of anti-hypertensive drugs within 2 weeks, or elevated blood pressure (systolic pressure  $\geq 140$ mmhg or diastolic pressure  $\geq 90$ mmhg) in the on-site measurement[16]. Diabetes was diagnosed by self-report history of diabetes, or current use of hypoglycemic drugs, or fasting blood glucose  $\geq 7.0$ mmol/l in the on-site measurement[17]. Dyslipidemia was diagnosed by self-reported history of dyslipidemia, or current use of lipid-lowering drugs, or the detection of one or more of the following status (total cholesterol  $\geq 240$  mg/dl, triglycerides  $\geq 200$  mg/dl, HDL  $< 40$  mg/dl) in the on-site measurement[17]. AF was diagnosed by self-reported history of AF, or previous electrocardiogram support, or the detection of AF indicated in electrocardiogram in the on-site measurement[18]. Body mass index was calculated as weight in kilograms divided by height in meters squared. Overweight was defined as  $24 \leq \text{BMI} < 28$ , and obesity was defined as  $\text{BMI} \geq 28$ [16]. Smoking was defined as one cigarette per day for at least three consecutive months. Regular drinking was defined as drinking at least 3 times per week with the consumption of alcohol more than 100 g. Lack of exercise was defined as weekly exercise less than 3 times the intensity of moderate and above exercise  $\geq 30$  minutes. Exercise lack is defined as moderate or higher intensity exercise no less than 3 times per week, no less than 30 minutes each time.

## 2.4 Quality control

The National Health and Family Planning Commission had established a special project office responsible for the quality control, organization and coordination of the project. Firstly, this study conducted a unified training for all personnel involved in questionnaire survey, physical examination and data entry. The training course was divided into two steps below: the provincial training was responsible by the project office, and the training of participating units in the province was managed by provincial units. In the on-site survey, each sub-center had a trained staff, usually a neurologist, responsible for the review and reporting of data. Secondly, the data reporting information platform could realize automatic control of the system, systematic checking of necessary items, and questionnaires with unfinished or incomplete items could not be submitted successfully. Thirdly, epidemiologists and statistical experts were organized by the project office to analyze the data reported by the sub-centers, who were responsible for checking abnormal data and returning to the sub-centers for one-by-one review.

## 2.5 Patient and public involvement

Patients were not involved in the design, or conduct, or reporting, or dissemination plans of our research.

## 2.6 Statistical analysis

The statistical analysis was carried out in two steps. Firstly, Risk factors of CHD and stroke were explored and analyzed in the whole investigated population to identify the common risk factors. Secondly, people with both CHD and stroke were excluded, as well as those neither with CHD nor with stroke, we just took the samples only with CHD and the samples only with stroke as our analysis population, then taking CVD as dependent variables (stroke was defined as 1, whereas CHD was defined as 0) and the common risk factors as independent variables, multivariate logistic regression analysis was carried out to study the distribution difference of the common risk factors between CHD and stroke.

Descriptive analysis was performed for baseline information. Categorical variables were expressed as n (%), and continuous variables were presented in the form of mean  $\pm$  standard deviation.  $\chi^2$  test and t test were used for univariate analysis of categorical variables and continuous variables, and the differences were statistically significant with  $P < 0.1$ . Binary Logistic regression was utilized for multivariate analysis, the odd ratio (OR) and 95% confidence interval (CI) were calculated by backward stepwise regression, and the difference was statistically significant with  $P < 0.05$ . SPSS19.0 was used for all statistical analyses (SPSS Inc., Chicago, Illinois, USA).

## 3 Results

### 3.1 Basic information

A total of 828 764 permanent residents in general communities aged 40 and above completed the survey from May 2014 to April 2015. Of these, we excluded data from project areas with a response rate less than 85%, incomplete baseline information and abnormal data. Finally, 725 707 people were included in the study. The average age was  $57.23 \pm 11.40$  years, with males accounting for 46.73% and the rural population accounting for 52.55% of the total. All variables had sex difference except BMI. To be specific, the rates of smoking and drinking of males were significantly higher than those of females, whereas there was an opposite relationship in other variables. Furthermore, except

1  
2 161 hypertension, all variables revealed geographical difference. The proportion of smoking and drinking  
3 162 in rural areas was higher than that in urban areas, and the proportion of other variables in urban areas  
4 163 were higher than that in rural areas (Table 1).  
5  
6  
7  
8  
9  
10  
11  
12  
13  
14  
15  
16  
17  
18  
19  
20  
21  
22  
23  
24  
25  
26  
27  
28  
29  
30  
31  
32  
33  
34  
35  
36  
37  
38  
39  
40  
41  
42  
43  
44  
45  
46  
47  
48  
49  
50  
51  
52  
53  
54  
55  
56  
57  
58  
59  
60

For peer review only

Table 1. General Characteristics of the CNSSS

| Characteristics          | Total, n (%)  | Sex, n (%)    |               | Region, n (%) |               | P value for sex | P value for region |
|--------------------------|---------------|---------------|---------------|---------------|---------------|-----------------|--------------------|
|                          |               | female        | male          | urban         | rural         |                 |                    |
| Age, y                   | 57.23±11.40   | 57.40±11.38   | 57.03±11.41   | 57.26±11.50   | 57.20±11.30   | < 0.001         | 0.029              |
| 40~                      | 224173(30.89) | 115964(30.00) | 108209(31.91) | 106788(31.01) | 117385(30.78) | < 0.001         | < 0.001            |
| 50~                      | 213000(29.35) | 115023(29.76) | 97977(28.89)  | 101240(29.40) | 111760(29.31) |                 |                    |
| 60~                      | 172780(23.81) | 93393(24.16)  | 79387(23.41)  | 79411(23.06)  | 93369(24.48)  |                 |                    |
| 70~                      | 86475(11.92)  | 46161(11.94)  | 40314(11.89)  | 42716(12.41)  | 43759(11.47)  |                 |                    |
| 80~                      | 29279(4.03)   | 16018(4.14)   | 13261(3.91)   | 14188(4.12)   | 15091(3.96)   |                 |                    |
| Height, cm               | 162.96±8.12   | 158.26±6.31   | 168.31±6.48   | 163.95±7.91   | 162.06±8.20   | < 0.001         | < 0.001            |
| Weight, kg               | 63.63±10.04   | 59.94±8.87    | 67.83±9.63    | 64.69±9.99    | 62.66±9.98    | < 0.001         | < 0.001            |
| BMI, kg/m <sup>2</sup>   | 23.91±3.04    | 23.92±3.20    | 23.90±2.85    | 24.02±3.00    | 23.81±3.07    | 0.130           | < 0.001            |
| < 18.5                   | 16308(2.25)   | 10052(2.60)   | 6256(1.84)    | 6913(2.01)    | 9395(2.46)    | < 0.001         | < 0.001            |
| 18.5~24                  | 380043(52.37) | 201371(52.09) | 178672(52.68) | 174900(50.79) | 205143(53.79) |                 |                    |
| 24~28                    | 264385(36.43) | 136843(35.40) | 127542(37.61) | 131176(38.09) | 133209(34.93) |                 |                    |
| ≥28                      | 64971(8.95)   | 38293(9.91)   | 26678(7.87)   | 31354(9.11)   | 33617(8.81)   |                 |                    |
| Smoking                  | 47997(6.61)   | 4163(1.08)    | 43834(12.92)  | 20223(5.87)   | 27774(7.28)   | < 0.001         | < 0.001            |
| Regular drinking         | 24939(3.44)   | 2148(0.56)    | 22791(6.72)   | 11574(3.36)   | 13365(3.50)   | < 0.001         | 0.001              |
| Lack of exercise         | 59712(8.23)   | 33104(8.56)   | 26608(7.85)   | 31722(9.21)   | 27990(7.34)   | < 0.001         | < 0.001            |
| Hypertension             | 121281(16.71) | 65681(16.99)  | 55600(16.39)  | 57538(16.71)  | 63743(16.71)  | < 0.001         | 0.955              |
| Diabetes                 | 39752(5.48)   | 22283(5.76)   | 17469(5.15)   | 21770(6.32)   | 17982(4.72)   | < 0.001         | < 0.001            |
| Dyslipidemia             | 113159(15.59) | 62817(16.25)  | 50342(14.84)  | 56793(16.55)  | 56186(14.73)  | < 0.001         | < 0.001            |
| AF                       | 2783(0.38)    | 1636(0.42)    | 1147(0.34)    | 1433(0.42)    | 1350(0.35)    | < 0.001         | < 0.001            |
| TIA                      | 13284(1.83)   | 8199(2.12)    | 5085(1.50)    | 6707(1.95)    | 6577(1.72)    | < 0.001         | < 0.001            |
| Family history of CHD    | 13077(1.80)   | 7947(2.06)    | 5130(1.51)    | 8070(2.34)    | 5007(1.31)    | < 0.001         | < 0.001            |
| Family history of stroke | 30103(4.15)   | 16987(4.39)   | 13116(3.87)   | 15553(4.52)   | 14550(3.82)   | < 0.001         | < 0.001            |

CNSSS, China National Stroke Screening Survey; BMI, body mass index; AF, atrial fibrillation; TIA, transient ischemic attack; CHD, coronary heart disease

### 166 3.2 Common risk factors of CHD and stroke

167 In the univariate factor analysis, all 14 variables were associated with CHD and stroke (Table 2).  
168 After adjusting for other risk factors, 13 variables (except alcohol consumption) were associated with  
169 CHD and stroke. There was a negative correlation of males and rural population with CHD, while  
170 hypertension, family history of CHD, dyslipidemia, AF, TIA, smoking, diabetes, family history of  
171 stroke, age, lack of exercise, overweight/obesity and alcohol consumption were positively correlated  
172 with CHD. Besides, all the 13 risk factors were positively correlated with stroke (Table 3). According  
173 to the odds ratio (OR) value from high to low, Figure 1 showed the distribution of risk factors of  
174 CHD and stroke.

For peer review only

1

2 175

Table 2. Univariate analysis of risk factors for CHD and stroke

| Characteristics          | CHD, n (%)  |               |           |         | Stroke, n (%) |               |           |         |
|--------------------------|-------------|---------------|-----------|---------|---------------|---------------|-----------|---------|
|                          | Yes         | No            | $\chi^2$  | P value | Yes           | No            | $\chi^2$  | P value |
| Total                    | 10654       | 715053        |           |         | 15989         | 709718        |           |         |
| Sex (male)               | 4125(28.72) | 335023(46.85) | 279.078   | < 0.001 | 8110(50.72)   | 331038(46.64) | 104.502   | < 0.001 |
| Region (rural)           | 4379(41.10) | 376985(52.72) | 568.386   | < 0.001 | 8515(53.26)   | 372849(52.53) | 3.256     | 0.071   |
| Age                      |             |               | 4657.234  | < 0.001 |               |               | 6926.216  | < 0.001 |
| 40~                      | 687(6.45)   | 223486(31.25) |           |         | 913(5.71)     | 223260(31.46) |           |         |
| 50~                      | 2324(21.81) | 210676(29.46) |           |         | 3539(22.13)   | 209461(29.51) |           |         |
| 60~                      | 4209(39.51) | 168571(23.57) |           |         | 6644(41.55)   | 166136(23.41) |           |         |
| 70~                      | 2767(25.97) | 83708(11.71)  |           |         | 3915(24.49)   | 82560(11.63)  |           |         |
| 80~                      | 667(6.26)   | 28612(4.00)   |           |         | 978(6.12)     | 28301(3.99)   |           |         |
| BMI                      |             |               | 2767.767  | < 0.001 |               |               | 2261.651  | < 0.001 |
| < 18.5                   | 207(1.94)   | 16101(2.25)   |           |         | 322(2.01)     | 15986(2.25)   |           |         |
| 18.5~24                  | 3420(32.10) | 376623(52.67) |           |         | 5875(36.74)   | 374168(52.72) |           |         |
| 24~28                    | 4588(43.06) | 259797(36.33) |           |         | 6841(42.79)   | 257544(36.29) |           |         |
| ≥28                      | 2439(22.89) | 62532(8.75)   |           |         | 2951(18.46)   | 62020(8.74)   |           |         |
| Smoking                  | 2628(24.67) | 45369(6.34)   | 5705.550  | < 0.001 | 4416(27.62)   | 43581(6.14)   | 11679.211 | < 0.001 |
| Regular drinking         | 1551(14.56) | 23388(3.27)   | 4030.177  | < 0.001 | 2484(17.81)   | 22455(3.16)   | 7212.358  | < 0.001 |
| Lack of exercise         | 4269(40.07) | 55443(7.75)   | 14518.060 | < 0.001 | 6013(37.61)   | 53699(7.57)   | 18687.903 | < 0.001 |
| Hypertension             | 8614(80.85) | 112667(15.76) | 31958.204 | < 0.001 | 13182(82.44)  | 108099(15.23) | 50750.234 | < 0.001 |
| Diabetes                 | 3565(33.46) | 36187(5.06)   | 16353.881 | < 0.001 | 4118(25.75)   | 35634(5.02)   | 12983.573 | < 0.001 |
| Dyslipidemia             | 6883(64.60) | 106276(14.86) | 19734.787 | < 0.001 | 8982(56.18)   | 104177(14.68) | 20458.912 | < 0.001 |
| AF                       | 397(3.73)   | 2386(0.33)    | 3162.834  | < 0.001 | 387(2.42)     | 2396(0.34)    | 1775.677  | < 0.001 |
| TIA                      | 1409(13.23) | 11875(1.66)   | 7812.480  | < 0.001 | 2504(15.66)   | 10780(1.52)   | 17402.607 | < 0.001 |
| Family history of CHD    | 2762(25.92) | 10315(1.44)   | 35557.668 | < 0.001 | 1808(11.31)   | 11269(1.59)   | 8348.822  | < 0.001 |
| Family history of stroke | 3061(28.73) | 27042(3.78)   | 16434.360 | < 0.001 | 6069(37.96)   | 24034(3.39)   | 47002.257 | < 0.001 |

176 CHD, coronary heart disease; BMI, body mass index; AF, atrial fibrillation; TIA, transient ischemic attack

39

40

41

42

43

44

45

46

47

48

49

50

51

52

53

54

55

56

57

58

59

60

177 Table 3. Multivariate logistic regression analysis of risk factors for CHD and stroke

| Characteristics          | CHD             |         | Stroke          |         |
|--------------------------|-----------------|---------|-----------------|---------|
|                          | OR (95%CI)      | P value | OR (95%CI)      | P value |
| Sex (male)               | 0.63(0.59-0.66) | < 0.001 | 1.18(1.14-1.23) | < 0.001 |
| Region (rural)           | 0.73(0.70-0.76) | < 0.001 | 1.17(1.13-1.21) | < 0.001 |
| Age                      | 1.54(1.51-1.57) | < 0.001 | 1.52(1.50-1.55) | < 0.001 |
| BMI                      | 1.16(1.13-1.20) | < 0.001 | 1.03(1.00-1.05) | 0.034   |
| Smoking                  | 1.79(1.68-1.90) | < 0.001 | 1.45(1.39-1.52) | < 0.001 |
| Lack of exercise         | 1.37(1.31-1.43) | < 0.001 | 1.35(1.30-1.40) | < 0.001 |
| Hypertension             | 5.83(5.49-6.18) | < 0.001 | 9.09(8.65-9.55) | < 0.001 |
| Diabetes                 | 1.76(1.68-1.84) | < 0.001 | 1.30(1.25-1.36) | < 0.001 |
| Dyslipidemia             | 2.03(1.94-2.13) | < 0.001 | 1.44(1.38-1.49) | < 0.001 |
| AF                       | 1.98(1.76-2.24) | < 0.001 | 1.28(1.13-1.44) | < 0.001 |
| TIA                      | 1.97(1.85-2.11) | < 0.001 | 2.92(2.77-3.08) | < 0.001 |
| Family history of CHD    | 4.89(4.63-5.17) | < 0.001 | 1.09(1.03-1.16) | 0.004   |
| Family history of stroke | 1.60(1.52-1.68) | < 0.001 | 4.33(4.16-4.50) | < 0.001 |
| Regular drinking         | 1.10(1.03-1.18) | 0.007   | .....           | .....   |

178 CHD, coronary heart disease; BMI, body mass index; AF, atrial fibrillation; TIA, transient ischemic attack

### 179 3.3 Distribution differences of common risk factors between CHD and stroke

180 After the exclusion of 1,988 patients with both CHD and stroke, there were 8,666 patients with CHD  
 181 and 14,001 patients with stroke separately. In multivariate logistic regression analysis, CVD was  
 182 taken as the dependent variable (stroke was defined as 1, whereas CHD was defined as 0) and the 13  
 183 common risk factors were taken as independent variables. The results showed that 11 of 13 risk  
 184 factors (except age and lack of exercise) revealed differences in the distribution between CHD and  
 185 stroke (Table 4). The risk factors with OR>1 were more frequently detected in stroke patients, and  
 186 others with OR<1 may be more frequently detected in CHD patients. The family history of stroke,  
 187 male, rural area, TIA and hypertension were more closely associated with stroke, while the family  
 188 history of CHD, AF, diabetes, dyslipidemia, smoking and overweight/obesity indicated stronger  
 189 relationship with CHD. Figure 2 displayed the distribution differences of risk factors for stroke and  
 190 CHD.

191 Table 4. Multivariate logistic regression analysis of common risk factors distribution between CHD and stroke

| Characteristics          | OR   | 95%CI     | P value |
|--------------------------|------|-----------|---------|
| Family history of stroke | 2.30 | 2.15-2.45 | < 0.001 |
| Sex (male)               | 1.92 | 1.80-2.05 | < 0.001 |
| Region (rural)           | 1.70 | 1.60-1.80 | < 0.001 |
| TIA                      | 1.41 | 1.30-1.54 | < 0.001 |
| Hypertension             | 1.28 | 1.19-1.38 | < 0.001 |
| BMI                      | 0.90 | 0.86-0.93 | < 0.001 |
| Smoking                  | 0.79 | 0.73-0.85 | < 0.001 |



|                       |      |           |         |
|-----------------------|------|-----------|---------|
| Dyslipidemia          | 0.76 | 0.72-0.81 | < 0.001 |
| Diabetes              | 0.76 | 0.71-0.81 | < 0.001 |
| AF                    | 0.60 | 0.51-0.71 | < 0.001 |
| Family history of CHD | 0.25 | 0.23-0.27 | < 0.001 |

192 CHD, coronary heart disease; TIA, transient ischemic attack; BMI, body mass index; AF, atrial fibrillation

193 Subgroup analysis by gender and region showed that the distribution differences of risk factors  
 194 between CHD and stroke also existed in different gender and region groups (Figure 3). The risk  
 195 factors that were more closely related to stroke were the same across different genders or regions  
 196 (Table 5, Table 6). Smoking and lack of exercise were more closely related to CHD than stroke in the  
 197 female population, but not in the male population (Table 5). AF and lack of exercise were more  
 198 closely related to CHD than stroke in rural area, but not in urban area (Table 6).

199 Table 5. Subgroup Analysis of Distribution Differences by gender

| Characteristics          | Women           |         | Men             |         |
|--------------------------|-----------------|---------|-----------------|---------|
|                          | OR (95%CI)      | P value | OR (95%CI)      | P value |
| Family history of stroke | 2.19(2.01-2.39) | < 0.001 | 2.44(2.20-2.71) | < 0.001 |
| Region (rural)           | 1.61(1.49-1.73) | < 0.001 | 1.84(1.68-2.01) | < 0.001 |
| TIA                      | 1.35(1.21-1.51) | < 0.001 | 1.52(1.32-1.76) | < 0.001 |
| Hypertension             | 1.20(1.08-1.32) | < 0.001 | 1.39(1.25-1.56) | < 0.001 |
| BMI                      | 0.91(0.86-0.95) | < 0.001 | 0.88(0.83-0.93) | < 0.001 |
| Diabetes                 | 0.76(0.70-0.83) | < 0.001 | 0.75(0.68-0.83) | < 0.001 |
| Dyslipidemia             | 0.81(0.75-0.88) | < 0.001 | 0.71(0.65-0.77) | < 0.001 |
| AF                       | 0.73(0.59-0.91) | 0.005   | 0.47(0.36-0.61) | < 0.001 |
| Family history of CHD    | 0.25(0.23-0.28) | < 0.001 | 0.24(0.21-0.27) | < 0.001 |
| Smoking                  | 0.47(0.41-0.55) | < 0.001 | .....           | .....   |
| Lack of exercise         | 0.92(0.85-0.99) | 0.036   | .....           | .....   |

200 TIA, transient ischemic attack; BMI, body mass index; AF, atrial fibrillation; CHD, coronary heart disease

201 Table 6. Subgroup Analysis of Distribution Differences by region

| Characteristics          | Rural           |         | Urban           |         |
|--------------------------|-----------------|---------|-----------------|---------|
|                          | OR (95%CI)      | P value | OR (95%CI)      | P value |
| Sex (male)               | 2.51(2.27-2.79) | < 0.001 | 1.56(1.43-1.70) | < 0.001 |
| Family history of stroke | 2.10(1.91-2.32) | < 0.001 | 2.44(2.23-2.66) | < 0.001 |
| TIA                      | 1.31(1.15-1.48) | < 0.001 | 1.51(1.34-1.70) | < 0.001 |
| Hypertension             | 1.24(1.11-1.39) | < 0.001 | 1.32(1.19-1.45) | < 0.001 |
| BMI                      | 0.92(0.87-0.97) | 0.002   | 0.87(0.83-0.92) | < 0.001 |
| Dyslipidemia             | 0.77(0.71-0.84) | < 0.001 | 0.75(0.69-0.82) | < 0.001 |
| Diabetes                 | 0.73(0.66-0.80) | < 0.001 | 0.78(0.72-0.85) | < 0.001 |
| Family history of CHD    | 0.21(0.18-0.23) | < 0.001 | 0.28(0.25-0.32) | < 0.001 |
| Lack of exercise         | 0.88(0.81-0.96) | 0.004   | .....           | .....   |
| Smoking                  | 0.55(0.49-0.61) | < 0.001 | .....           | .....   |
| AF                       | 0.38(0.30-0.48) | < 0.001 | .....           | .....   |

1  
2 203 TIA, transient ischemic attack; BMI, body mass index; CHD, coronary heart disease; AF, atrial fibrillation

## 3 4 204 **4 Discussion**

5  
6 205 The China National Stroke Screening Survey is a large sample size, nationwide community  
7 206 population-based cluster sampling survey, which can reflect the distribution of CVD and risk factors  
8 207 in real world. This study showed that CHD and stroke had many common risk factors, while the  
9 208 distribution of these risk factors between CHD and stroke were substantial differences.

### 10 11 209 **4.1 Necessity of comprehensive screening and prevention of CVD in China**

12  
13 210 As revealed in the present study, there were substantial similarities in the association of risk factors  
14 211 with CHD and stroke, including hypertension, diabetes, dyslipidemia, AF, TIA, smoking,  
15 212 overweight/obesity, lack of exercise, family history of CVD, age, sex and region. An enormous  
16 213 amount of studies has confirmed that these traditional risk factors are related to CVD[7,21], although  
17 214 the pathophysiological mechanisms leading to CVD are not identical. At present, China has a large  
18 215 number of high-risk groups of CVD, including 244.5 million hypertension, 113.9 million diabetes,  
19 216 358.3 million dyslipidemia, and 7.7 million atrial fibrillation[22-25]. In order to reduce the disease  
20 217 burden caused by CVD, the Chinese government launched the screening and prevention programs for  
21 218 CHD and stroke[19,26], respectively. Since CHD and stroke have many common risk factors, we  
22 219 believe that it is necessary to carry out comprehensive screening and prevention of CVD. We found  
23 220 that hypertension is the most important risk factor for both CHD and stroke. Although the latest  
24 221 survey shows that the awareness rate, treatment rate and control rate of hypertension in China have  
25 222 been improved, but compared with the developed countries is still very low[21,22]. These results  
26 223 suggest that interventions for hypertension are still a top priority for CVD prevention in China.

### 27 28 224 **4.2 Heterogeneity of risk factor distribution**

29  
30 225 The distribution of most risk factors involved in this study was significantly different between CHD  
31 226 and stroke. Family history of CVD was the most different risk factor for CHD and stroke among all  
32 227 risk factors. Men were more closely associated with stroke, while women were more closely  
33 228 associated with CHD. Geographically, stroke was more likely in rural population and CHD more  
34 229 likely in urban population. Among the risk factors that can be intervened, AF, dyslipidemia, diabetes,  
35 230 smoking, overweight/obesity were more closely related to CHD, while TIA and hypertension were  
36 231 more closely related to stroke.

37  
38 232 The heterogeneity of the relationship between specific risk factors and different types of CVD may  
39 233 be related to the pathophysiological mechanisms of these risk factors in different types of CVD. As  
40 234 expected, we found that hypertension is more related to stroke, while dyslipidemia is more related to  
41 235 CHD, which is consistent with previous studies[11,13,14]. The possible reasons are that hypertension  
42 236 increases the risk of ischemic stroke and hemorrhagic stroke at the same time, while dyslipidemia  
43 237 shows the opposite effect[21]. On the pathophysiological mechanism, the strong association between  
44 238 hypertension and stroke might be explained by the relationship between hypertension and cerebral  
45 239 small vessel disease or atrial fibrillation[13,27]. Conversely, the relationship of different lipid  
46 240 subtypes with ischemic and hemorrhagic stroke are different. Hypercholesterolemia increases the risk  
47 241 of ischemic stroke but reduces the risk of hemorrhagic stroke. Higher level of low-density lipoprotein  
48 242 cholesterol seems to be associated with lower risk of hemorrhagic stroke, however high-density  
49 243 lipoprotein cholesterol level seems to be positively associated with risk of intracerebral  
50 244 hemorrhage[28,29]. In addition, diabetes and smoking were associated with ischemic stroke, but not  
51 245 predictive of hemorrhagic stroke[11]. This may be the reason why they are more closely related to

1  
2 246 CHD. Contrary to expectations, atrial fibrillation is more closely associated with CHD than stroke.  
3 247 The possible reason is that CHD increases the risk of atrial fibrillation, while stroke does not increase  
4 248 the risk of atrial fibrillation[30,31].  
5

6 249 Elucidating the underlying mechanism for the heterogeneity of specific risk factors distribution on  
7 250 CVD types requires further work. Only a few studies focused on the differences of risk factors  
8 251 between CHD and stroke in a same cohort in the past[10-13]. There was a great heterogeneity among  
9 252 these studies, for example, the Women's Health Initiative Observational Study included only female  
10 253 and sample size is small[11], the Physicians' Health Study included only male[10], the Rotterdam  
11 254 study just compared gender differences in one area of the population[12], the EPIC-Norfolk Study  
12 255 included only three risk factors (LDL-c, systolic blood pressure and smoking) [13]. Findings in our  
13 256 study were consistent with those reported in EPIC-Norfolk Study and Women's Health Initiative  
14 257 Observational Study. The EPIC-Norfolk Study suggested that hypertension was intimately associated  
15 258 with stroke, and dyslipidemia showed stronger relationship with CHD[13]. Meanwhile, Women's  
16 259 Health Initiative Observational Study revealed that BMI, smoking, diabetes, family history of CHD  
17 260 and hypercholesterolemia were associated with CHD, while hypertension was related to stroke[11].  
18 261 Unlike our results, the Physicians' Health Study indicated no difference in the distribution of risk  
19 262 factors such as hypertension, hypercholesterolemia, diabetes, smoking and physical exercise between  
20 263 CHD and stroke[10]. Contrary to our results, the Rotterdam study showed that females were more  
21 264 likely to have stroke, while males had higher risk of CHD[12]. The reason for this huge difference  
22 265 may be the different race, age and occupation backgrounds included in different studies. Besides, the  
23 266 geographical environment and climate of different countries may also play an important role[32].  
24 267 Different countries should formulate corresponding prevention and control measures for CVD  
25 268 according to the prevalence and distribution of risk factors in their own countries.  
26  
27  
28  
29

### 30 269 **4.3 Implications**

31  
32 270 Our results could suggest that differences may exist in the efficacy of improving specific risk factors  
33 271 across CVD types. The heterogeneity in the association between particular risk factors and specific  
34 272 CVD types demonstrated in the current study could improve the selection of high-risk patients for  
35 273 population-based screening programs. For example, for women with a family history of CHD, more  
36 274 attention should be paid to the prevention of CHD, and for men with a family history of stroke, more  
37 275 stroke should be prevented. In addition, the results of this study are helpful for clinical studies to  
38 276 select appropriate endpoint indicators. Heterogeneity in the definitions of composite endpoints may  
39 277 lead to different results and conclusions on the efficacy of study interventions and could lead to over-  
40 278 or underestimation of the effect on specific CVD types. The specific types of CVD events may vary  
41 279 depending on the risk factors for clinical intervention. In the study of lipid lowering, the risk of CHD  
42 280 should be paid more attention, while the study of blood pressure lowering should pay more attention  
43 281 to the risk of stroke.  
44  
45  
46

47 282 There are several limitations in this study. Firstly, the judgment of CVD events was mainly based  
48 283 on self-reported history. In order to reduce the recall bias, each CVD event should be confirmed by a  
49 284 specialist in cardiology or neurology to make the diagnosis as accurate as possible. Secondly, this  
50 285 study was a cross-sectional survey that can only indicate the correlation between risk factors and  
51 286 CVD, without the ability to reflect the causal relationship. However, this study has a large sample  
52 287 size and is based on a nationwide cluster sampling survey, which can explain the relationship  
53 288 between specific risk factors and CVD types to a certain extent.  
54  
55

## 56 289 **5 Conclusion**

1  
2 290 Although CHD and stroke had many common risk factors, the distribution of these risk factors  
3 291 between CHD and stroke were substantial differences. More specific prevention and control  
4 292 measures should be formulated according to the distribution differences of risk factors related to  
5 293 CVD.  
6

## 7 294 **6 Contributorship statement**

9  
10 295 LD W and YM X contributed to research design and the revision of this manuscript; YP L  
11 296 contributed to research design, data collection and writing of this manuscript; L Y, Y S, YS L, J L  
12 297 and SH S contributed to data collection and processing; AR W, L Z, Y G, CS T contributed to data  
13 298 collection and the revision of the manuscript; all authors read and approved the final manuscript.  
14

## 15 299 **7 Competing interests**

16  
17 300 None.  
18

## 19 301 **8 Funding**

20  
21 302 This study was supported by grants from the National Key R&D Program of China  
22 303 (2018YFC1311303), the Non-profit Central Research Institute Fund of Chinese Academy of Medical  
23 304 Sciences (2020-PT310-01) and the Young Elite Scientists Sponsorship Program by Henan  
24 305 Association for Science and Technology (2022HYTP048).  
25  
26

## 27 306 **9 Data sharing**

28  
29 307 The data are available upon reasonable request from the corresponding authors.  
30

## 31 308 **10 Acknowledgments**

32  
33 309 We thank all the participants of the CNSSS and all the colleagues from 256 sub-centers in 31  
34 310 provinces who worked very hard to ensure the accuracy of the data.  
35  
36

## 37 311 **11 Ethics Approval**

38  
39 312 The study was approved by the ethics committee of the First Affiliated Hospital of Zhengzhou  
40 313 University (2021-KY-0067-001).  
41

## 42 314 **12 References**

- 43 315 1. Roth GA, Mensah GA, Johnson CO, et al. Global Burden of Cardiovascular Diseases and Risk Factors, 1990-2019: Update  
44 316 From the GBD 2019 Study. *J Am Coll Cardiol* 2020;76:2982-3021.
- 45 317 2. Global, regional, and national burden of stroke and its risk factors, 1990-2019: a systematic analysis for the Global Burden of  
46 318 Disease Study 2019. *Lancet Neurol* 2021;20:795-820.
- 47 319 3. Global burden of 369 diseases and injuries in 204 countries and territories, 1990-2019: a systematic analysis for the Global  
48 320 Burden of Disease Study 2019. *Lancet* 2020;396:1204-22.
- 49 321 4. Irawati S, Wasir R, Floriaan Schmidt A, et al. Long-term incidence and risk factors of cardiovascular events in Asian  
50 322 populations: systematic review and meta-analysis of population-based cohort studies. *Curr Med Res Opin* 2019;35:291-9.
- 51 323 5. Virani SS, Alonso A, Aparicio HJ, et al. Heart Disease and Stroke Statistics-2021 Update: A Report From the American Heart  
52 324 Association. *Circulation* 2021;143:e254-254e743.

- 1  
2 325  
3 326
- 4  
5 327  
6 328  
7 329
- 8 330  
9 331
- 10  
11 332  
12 333
- 13  
14 334  
15 335
- 16 336  
17 337
- 18  
19 338  
20 339
- 21  
22 340  
23 341
- 24 342  
25 343  
26
- 27 344  
28 345  
29
- 30 346  
31 347
- 32  
33 348  
34 349
- 35 350  
36 351  
37
- 38 352  
39 353  
40
- 41 354  
42 355
- 43  
44 356  
45 357  
46 358
- 47 359  
48 360  
49
- 50 361  
51 362
- 52  
53 363  
54 364
- 55 365  
56 366  
57  
58  
59  
60
6. Zhao D, Liu J, Wang M, *et al.* Epidemiology of cardiovascular disease in China: current features and implications. *Nat Rev Cardiol* 2019;16:203-12.
  7. Goff DC Jr, Lloyd-Jones DM, Bennett G, *et al.* 2013 ACC/AHA guideline on the assessment of cardiovascular risk: a report of the American College of Cardiology/American Heart Association Task Force on Practice Guidelines. *Circulation* 2014;129:S49-73.
  8. Yang X, Li J, Hu D, *et al.* Predicting the 10-Year Risks of Atherosclerotic Cardiovascular Disease in Chinese Population: The China-PAR Project (Prediction for ASCVD Risk in China). *Circulation* 2016;134:1430-40.
  9. Pylypchuk R, Wells S, Kerr A, *et al.* Cardiovascular disease risk prediction equations in 400 000 primary care patients in New Zealand: a derivation and validation study. *Lancet* 2018;391:1897-907.
  10. Glynn RJ, Rosner B. Comparison of risk factors for the competing risks of coronary heart disease, stroke, and venous thromboembolism. *Am J Epidemiol* 2005;162:975-82.
  11. Leening M, Cook NR, Franco OH, *et al.* Comparison of Cardiovascular Risk Factors for Coronary Heart Disease and Stroke Type in Women. *J Am Heart Assoc* 2018;7:e007514.
  12. Leening MJ, Ferket BS, Steyerberg EW, *et al.* Sex differences in lifetime risk and first manifestation of cardiovascular disease: prospective population based cohort study. *BMJ* 2014;349:g5992.
  13. Stoekenbroek RM, Boekholdt SM, Luben R, *et al.* Heterogeneous impact of classic atherosclerotic risk factors on different arterial territories: the EPIC-Norfolk prospective population study. *Eur Heart J* 2016;37:880-9.
  14. Simons LA, Simons J, Friedlander Y, *et al.* A comparison of risk factors for coronary heart disease and ischaemic stroke: the Dubbo study of Australian elderly. *Heart Lung Circ* 2009;18:330-3.
  15. Guan T, Ma J, Li M, *et al.* Rapid transitions in the epidemiology of stroke and its risk factors in China from 2002 to 2013. *Neurology* 2017;89:53-61.
  16. Fu W, Cao S, Liu B, *et al.* Association of general and central adiposity with blood pressure among Chinese adults: results from the China National Stroke Prevention Project. *J Hypertens* 2018;36:2406-13.
  17. Longde W, Ling Y, Yang H, *et al.* Fixed-dose combination treatment after stroke for secondary prevention in China: a national community-based study. *Stroke* 2015;46:1295-300.
  18. Wang X, Fu Q, Song F, *et al.* Prevalence of atrial fibrillation in different socioeconomic regions of China and its association with stroke: Results from a national stroke screening survey. *Int J Cardiol* 2018;271:92-7.
  19. Chao BH, Yan F, Hua Y, *et al.* Stroke prevention and control system in China: CSPPC-Stroke Program. *Int J Stroke* 2021;16:265-72.
  20. Wang X, Li W, Song F, *et al.* Carotid Atherosclerosis Detected by Ultrasonography: A National Cross-Sectional Study. *J Am Heart Assoc* 2018;7.
  21. Arnett DK, Blumenthal RS, Albert MA, *et al.* 2019 ACC/AHA Guideline on the Primary Prevention of Cardiovascular Disease: A Report of the American College of Cardiology/American Heart Association Task Force on Clinical Practice Guidelines. *Circulation* 2019;140:e596-596e646.
  22. Wang Z, Chen Z, Zhang L, *et al.* Status of Hypertension in China: Results From the China Hypertension Survey, 2012-2015. *Circulation* 2018;137:2344-56.
  23. Li Y, Teng D, Shi X, *et al.* Prevalence of diabetes recorded in mainland China using 2018 diagnostic criteria from the American Diabetes Association: national cross sectional study. *BMJ* 2020;369:m997.
  24. Pan L, Yang Z, Wu Y, *et al.* The prevalence, awareness, treatment and control of dyslipidemia among adults in China. *Atherosclerosis* 2016;248:2-9.
  25. Wang Z, Chen Z, Wang X, *et al.* The Disease Burden of Atrial Fibrillation in China from a National Cross-sectional Survey. *Am J Cardiol* 2018;122:793-8.

- 1  
2 367  
3 368  
4  
5 369  
6 370  
7 371  
8 372  
9  
10 373  
11 374  
12  
13 375  
14 376  
15 377  
16 378  
17 379  
18  
19 380  
20 381  
21  
22 382  
23  
24  
25  
26  
27  
28  
29  
30  
31  
32  
33  
34  
35  
36  
37  
38  
39  
40  
41  
42  
43  
44  
45  
46  
47  
48  
49  
50  
51  
52  
53  
54  
55  
56  
57  
58  
59  
60
26. Lu J, Xuan S, Downing NS, *et al*. Protocol for the China PEACE (Patient-centered Evaluative Assessment of Cardiac Events) Million Persons Project pilot. *BMJ Open* 2016;6:e010200.
27. Sörös P, Whitehead S, Spence JD, *et al*. Antihypertensive treatment can prevent stroke and cognitive decline. *Nat Rev Neurol* 2013;9:174-8.
28. Glasser SP, Mosher A, Howard G, *et al*. What is the association of lipid levels and incident stroke. *Int J Cardiol* 2016;220:890-4.
29. Wang X, Dong Y, Qi X, *et al*. Cholesterol levels and risk of hemorrhagic stroke: a systematic review and meta-analysis. *Stroke* 2013;44:1833-9.
30. Jabre P, Jouven X, Adnet F, *et al*. Atrial fibrillation and death after myocardial infarction: a community study. *Circulation* 2011;123:2094-100.
31. January CT, Wann LS, Alpert JS, *et al*. 2014 AHA/ACC/HRS guideline for the management of patients with atrial fibrillation: a report of the American College of Cardiology/American Heart Association Task Force on Practice Guidelines and the Heart Rhythm Society. *J Am Coll Cardiol* 2014;64:e1-76.
32. Hadley MB, Vedanthan R, Fuster V. Air pollution and cardiovascular disease: a window of opportunity. *Nat Rev Cardiol* 2018;15:193-4.

## Figure Legends

### Figure 1. The rank of common risk factors of CHD and stroke based on OR value.

The solid line indicates that the ranking of risk factors goes down, while the dotted line indicates that the ranking goes up.

Abbreviation: CHD = coronary heart disease; AF = atrial fibrillation; TIA = transient ischemic attack; BMI = body mass index.

### Figure 2. The forest plots of distribution differences of common risk factors between CHD and stroke.

Abbreviation: TIA = transient ischemic attack; BMI = body mass index; AF = atrial fibrillation; CHD = coronary heart disease. The risk factors with  $OR > 1$  indicates a closer association with stroke, and others with  $OR < 1$  indicates a closer association with CHD.

### Figure 3. Subgroup analysis of distribution differences based on sex and region.

Abbreviation: TIA = transient ischemic attack; BMI = body mass index; AF = atrial fibrillation; CHD = coronary heart disease. The risk factors with  $OR > 1$  indicates a closer association with stroke, and others with  $OR < 1$  indicates a closer association with CHD.



Figure 1. The rank of common risk factors of CHD and stroke based on OR value

101x67mm (144 x 144 DPI)



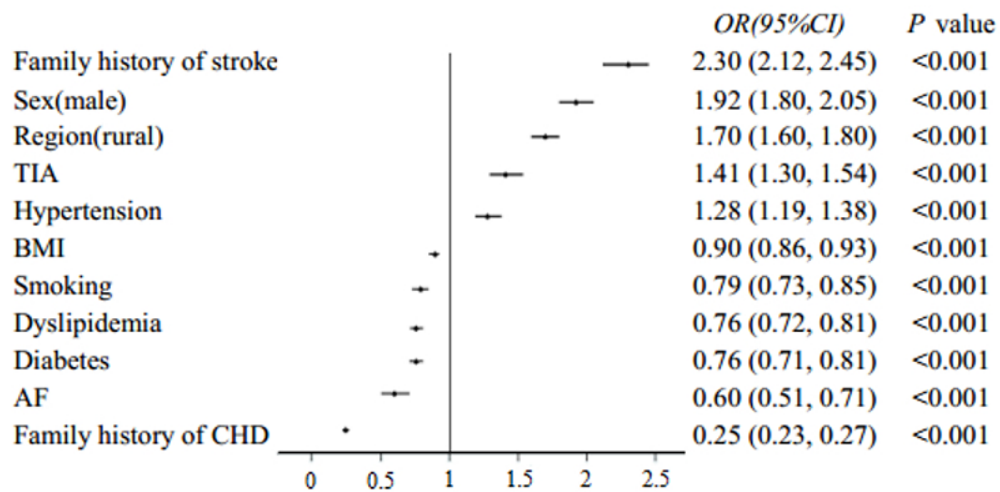

Figure 2. The forest plots of distribution differences of common risk factors between CHD and stroke

141x69mm (144 x 144 DPI)

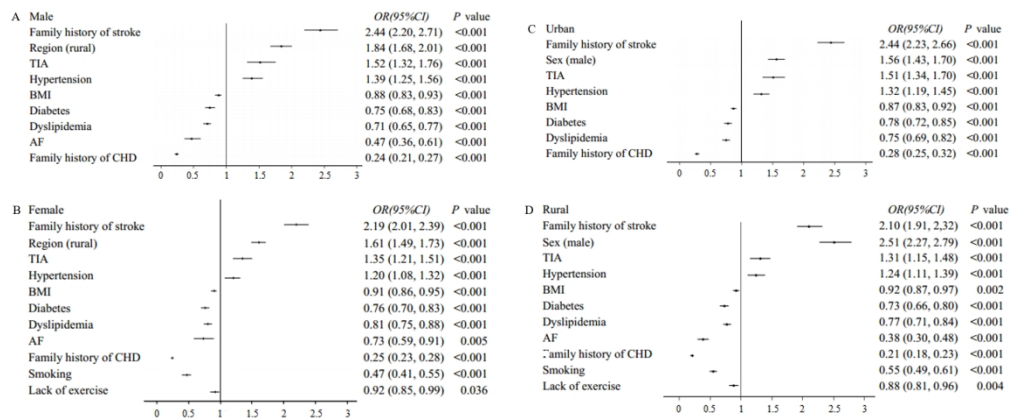

367x150mm (144 x 144 DPI)

## STROBE Statement—checklist of items that should be included in reports of observational studies

|                              | <b>Item No.</b> | <b>Recommendation</b>                                                                                                                                                                                                                                                                                                                                                                                                                                                  | <b>Page No.</b> |
|------------------------------|-----------------|------------------------------------------------------------------------------------------------------------------------------------------------------------------------------------------------------------------------------------------------------------------------------------------------------------------------------------------------------------------------------------------------------------------------------------------------------------------------|-----------------|
| <b>Title and abstract</b>    | 1               | (a) Indicate the study's design with a commonly used term in the title or the abstract                                                                                                                                                                                                                                                                                                                                                                                 | Page 1          |
|                              |                 | (b) Provide in the abstract an informative and balanced summary of what was done and what was found                                                                                                                                                                                                                                                                                                                                                                    | Line 45-47      |
| <b>Introduction</b>          |                 |                                                                                                                                                                                                                                                                                                                                                                                                                                                                        |                 |
| Background/rationale         | 2               | Explain the scientific background and rationale for the investigation being reported                                                                                                                                                                                                                                                                                                                                                                                   | Line 56-63      |
| Objectives                   | 3               | State specific objectives, including any prespecified hypotheses                                                                                                                                                                                                                                                                                                                                                                                                       | Line 71-73      |
| <b>Methods</b>               |                 |                                                                                                                                                                                                                                                                                                                                                                                                                                                                        |                 |
| Study design                 | 4               | Present key elements of study design early in the paper                                                                                                                                                                                                                                                                                                                                                                                                                | Line 76-78      |
| Setting                      | 5               | Describe the setting, locations, and relevant dates, including periods of recruitment, exposure, follow-up, and data collection                                                                                                                                                                                                                                                                                                                                        | Line 88-96      |
| Participants                 | 6               | (a) <i>Cohort study</i> —Give the eligibility criteria, and the sources and methods of selection of participants. Describe methods of follow-up<br><i>Case-control study</i> —Give the eligibility criteria, and the sources and methods of case ascertainment and control selection. Give the rationale for the choice of cases and controls<br><i>Cross-sectional study</i> —Give the eligibility criteria, and the sources and methods of selection of participants | Line 79-86      |
|                              |                 | (b) <i>Cohort study</i> —For matched studies, give matching criteria and number of exposed and unexposed<br><i>Case-control study</i> —For matched studies, give matching criteria and the number of controls per case                                                                                                                                                                                                                                                 |                 |
| Variables                    | 7               | Clearly define all outcomes, exposures, predictors, potential confounders, and effect modifiers. Give diagnostic criteria, if applicable                                                                                                                                                                                                                                                                                                                               | Line 98-118     |
| Data sources/<br>measurement | 8*              | For each variable of interest, give sources of data and details of methods of assessment (measurement). Describe comparability of assessment methods if there is more than one group                                                                                                                                                                                                                                                                                   | Line 98-118     |
| Bias                         | 9               | Describe any efforts to address potential sources of bias                                                                                                                                                                                                                                                                                                                                                                                                              | Line 120-131    |
| Study size                   | 10              | Explain how the study size was arrived at                                                                                                                                                                                                                                                                                                                                                                                                                              | Line 79-85      |

Continued on next page

|                        |     |                                                                                                                                                                                                                                                                                                                                                                                                                                                                                                                                                                   |              |
|------------------------|-----|-------------------------------------------------------------------------------------------------------------------------------------------------------------------------------------------------------------------------------------------------------------------------------------------------------------------------------------------------------------------------------------------------------------------------------------------------------------------------------------------------------------------------------------------------------------------|--------------|
| Quantitative variables | 11  | Explain how quantitative variables were handled in the analyses. If applicable, describe which groupings were chosen and why                                                                                                                                                                                                                                                                                                                                                                                                                                      | Line 144-147 |
| Statistical methods    | 12  | (a) Describe all statistical methods, including those used to control for confounding<br>(b) Describe any methods used to examine subgroups and interactions<br>(c) Explain how missing data were addressed<br>(d) <i>Cohort study</i> —If applicable, explain how loss to follow-up was addressed<br><i>Case-control study</i> —If applicable, explain how matching of cases and controls was addressed<br><i>Cross-sectional study</i> —If applicable, describe analytical methods taking account of sampling strategy<br>(e) Describe any sensitivity analyses | Line 136-150 |
| <b>Results</b>         |     |                                                                                                                                                                                                                                                                                                                                                                                                                                                                                                                                                                   |              |
| Participants           | 13* | (a) Report numbers of individuals at each stage of study—eg numbers potentially eligible, examined for eligibility, confirmed eligible, included in the study, completing follow-up, and analysed<br>(b) Give reasons for non-participation at each stage<br>(c) Consider use of a flow diagram                                                                                                                                                                                                                                                                   | Line 153-156 |
| Descriptive data       | 14* | (a) Give characteristics of study participants (eg demographic, clinical, social) and information on exposures and potential confounders<br>(b) Indicate number of participants with missing data for each variable of interest<br>(c) <i>Cohort study</i> —Summarise follow-up time (eg, average and total amount)                                                                                                                                                                                                                                               | Line 156-162 |
| Outcome data           | 15* | <i>Cohort study</i> —Report numbers of outcome events or summary measures over time<br><i>Case-control study</i> —Report numbers in each exposure category, or summary measures of exposure<br><i>Cross-sectional study</i> —Report numbers of outcome events or summary measures                                                                                                                                                                                                                                                                                 | Line 163     |
| Main results           | 16  | (a) Give unadjusted estimates and, if applicable, confounder-adjusted estimates and their precision (eg, 95% confidence interval). Make clear which confounders were adjusted for and why they were included<br>(b) Report category boundaries when continuous variables were categorized<br>(c) If relevant, consider translating estimates of relative risk into absolute risk for a meaningful time period                                                                                                                                                     | Line 166-191 |

Continued on next page

|                          |    |                                                                                                                                                                            |              |
|--------------------------|----|----------------------------------------------------------------------------------------------------------------------------------------------------------------------------|--------------|
| Other analyses           | 17 | Report other analyses done—eg analyses of subgroups and interactions, and sensitivity analyses                                                                             | Line 192-202 |
| <b>Discussion</b>        |    |                                                                                                                                                                            |              |
| Key results              | 18 | Summarise key results with reference to study objectives                                                                                                                   | Line 204-207 |
| Limitations              | 19 | Discuss limitations of the study, taking into account sources of potential bias or imprecision. Discuss both direction and magnitude of any potential bias                 | Line 281-287 |
| Interpretation           | 20 | Give a cautious overall interpretation of results considering objectives, limitations, multiplicity of analyses, results from similar studies, and other relevant evidence | Line 208-287 |
| Generalisability         | 21 | Discuss the generalisability (external validity) of the study results                                                                                                      | Line 283-285 |
| <b>Other information</b> |    |                                                                                                                                                                            |              |
| Funding                  | 22 | Give the source of funding and the role of the funders for the present study and, if applicable, for the original study on which the present article is based              | Line 301-304 |

\*Give information separately for cases and controls in case-control studies and, if applicable, for exposed and unexposed groups in cohort and cross-sectional studies.

**Note:** An Explanation and Elaboration article discusses each checklist item and gives methodological background and published examples of transparent reporting. The STROBE checklist is best used in conjunction with this article (freely available on the Web sites of PLoS Medicine at <http://www.plosmedicine.org/>, Annals of Internal Medicine at <http://www.annals.org/>, and Epidemiology at <http://www.epidem.com/>). Information on the STROBE Initiative is available at [www.strobe-statement.org](http://www.strobe-statement.org).
